1  
2 ***N*-linked glycans confer protein stability and modulate multidrug efflux pump assembly**  
3 ***in Campylobacter jejuni***

4  
5 Sherif Abouelhadid<sup>1</sup>, John Raynes<sup>1</sup>, Tam T.T. Bui<sup>2</sup>, Jon Cuccui<sup>1</sup>, Brendan W. Wren<sup>1</sup>

6 <sup>1</sup>Department of Pathogen Biology, London School of Hygiene and Tropical Medicine,  
7 London, WC1E 7HT, UK

8  
9 <sup>2</sup>Biomolecular Spectroscopy Centre, King's College London, The Wolfson Wing,  
10 Hodgkin, Building, SE1 1UL, UK

11  
12  
13  
14  
15  
16  
17 **Abstract**

18  
19  
20 It is now apparent that nearly all bacteria species have at least a single glycosylation  
21 system, but the direct effect(s) of these protein post translational modifications are  
22 unresolved. In this study, we used the general *N*-linked glycosylation pathway from  
23 *Campylobacter jejuni* to investigate the biophysical roles of protein modification on the  
24 CmeABC multidrug efflux pump complex. The study reveals the multifunctional role of *N*-  
25 linked glycans in enhancing protein thermostability, stabilising protein complexes and the  
26 promotion of protein-protein interaction. Our findings demonstrate, for the first time,  
27 that regardless of glycan diversification among domains of life, *N*-linked glycans confer a  
28 common evolutionary intrinsic role.

## Introduction

Glycosylation, the process of covalently attaching a glycan (mono-, oligo-, or polysaccharide) to an amino acid side chain, is the most prevalent post-translational modification found on proteins, occurring in all domains of life. The attachment of a carbohydrate moiety to certain amino acid side chains in proteins was traditionally thought to be exclusive to eukaryotes and archaea. In the last decade, protein glycosylation, both *N*- and *O*-linked, has been increasingly reported in pathogenic bacteria such as well as commensal bacteria<sup>1</sup>. Functional analysis of the role of *N*-glycans in eukaryotes shows multiple roles. Intrinsically, glycans confer protein stabilisation through a plethora of mechanisms such as, promoting secondary structure formation, accelerating protein folding, slowing the unfolding rate<sup>2</sup>, enhancing protein thermostability<sup>3</sup> and reducing aggregation<sup>4</sup>. Extrinsically, *N*-linked glycosylation modulates protein-protein interactions and protein targeting<sup>5</sup>. Notably, prokaryotes and eukaryotes share similar biosynthetic pathways of general *N*-linked glycosylation, indicating a common evolutionary pathway<sup>6</sup>. However, the role of *N*-linked glycans remains poorly studied in prokaryotes.

The first characterisation of an *N*-linked glycosylation in a bacterium was in the enteric pathogen *Campylobacter jejuni* which now has one of the most studied of all prokaryotic glycosylation pathways<sup>7</sup>. Genomic and proteomic studies have demonstrated that, PglB is an oligosaccharyltransferase responsible for the covalent attachment of *N*-linked glycan (GalNAc- $\alpha$ 1,4-GalNAc- $\alpha$ 1,4-GalNAc-[Glc $\beta$ 1,3-]GalNAc- $\alpha$ 1,4-GalNAc- $\alpha$ 1,4-GalNAc- $\alpha$ 1,3-Bac- $\beta$ 1; where GalNAc is *N*-acetylgalactosamine; Glc is glucose; diBacNAc is 2,4-diacetamido-2,4,6-trideoxyglucopyranose) to the asparagine residue in the acceptor sequon D/E-X<sub>1</sub>-N-X<sub>2</sub>-S/T where X<sub>1</sub> and X<sub>2</sub> are any amino acid except proline<sup>7</sup>. In depth studies on *N*-linked glycan diversity have revealed that there are 16 different glycans present in *Campylobacter* genus. Surprisingly, the first two glycans (diBacNAc and

58 HexNAc) were conserved in all species<sup>8,9</sup>. Whilst the role of *N*-linked glycan remains to be  
59 elucidated, disruption of the *N*-linked glycosylation pathway resulted in pleiotropic effects  
60 such as decreased chicken colonisation<sup>10</sup>, reduced adherence to intestinal cells<sup>11</sup> as well  
61 as impaired bacterial competence<sup>12</sup>. These studies did not ascertain the direct role of *N*-  
62 linked glycans in the *C. jejuni* glycoproteome. To address this, we sought to investigate the  
63 biophysical role of *N*-linked glycosylation on a representative post translationally modified  
64 glycoprotein. We demonstrate a critical role for glycosylation by focusing on a resistance-  
65 nodulation-division type (RND) multidrug efflux pump denoted *Campylobacter* multidrug  
66 efflux; CmeABC.

67  
68 CmeABC is a tripartite molecular assembly of glycoproteins, CmeB; an inner membrane  
69 multidrug transport protein, CmeA; a periplasmic fusion protein and CmeC; an outer  
70 membrane associated channel. The complex plays a key role in chicken colonization<sup>13</sup>, as  
71 well as being responsible for multidrug resistance (MDR)<sup>14</sup>. Previously, we demonstrated  
72 that disrupting *pglB* in *C. jejuni* impaired the efflux activity of CmeABC resulting in  
73 significantly higher ethidium bromide accumulation when compared to the wildtype  
74 (Abouelhadid S, *et al* submitted manuscript). The absence of glycosylation on the CmeABC  
75 locus within *C. jejuni* was also shown to reduce resistance to four different antibiotic  
76 classes. Here in, we show that the loss of *N*-linked glycans in CmeABC is the sole reason  
77 for this phenotype and not a pleiotropic effect caused by *pglB* disruption. We also unravel  
78 the intrinsic role of *N*-linked glycans in a) modulating global protein structure b) enhancing  
79 glycosylated CmeA; g2CmeA thermostability and c) significantly slowing the unfolding rate  
80 of g2CmeA. Finally, we evaluate the extrinsic role of *N*-linked glycans in the molecular  
81 assembly of CmeABC to discern the difference in binding kinetics of CmeA variants to  
82 CmeC. The study highlights the multifunctional role of *N*-linked glycans in enhancing  
83 protein thermostability, stabilising protein complexes and the promotion of protein-  
84 protein interaction. Here we present a model *N*-linked glycosylation system with a

tractable phenotype to be used in studying glycan evolution, function and diversity. Our findings demonstrate, for the first time, that regardless of glycan diversification among domains of life, *N*-linked glycans seem to confer a common evolutionary intrinsic role.

## Results

### ***N*-linked glycans do not affect CmeABC protein expression nor protect CmeC from native proteolytic degradation.**

Scrutiny of the *C. jejuni* NCTC11168 genome revealed the presence of 13 multidrug efflux transporters, which appear conserved in the species<sup>15</sup>. Genetic and biochemical testing demonstrated that *cmeABC* is located in an operon and encodes the predominant multidrug efflux pump in *C. jejuni*. In addition to its central role in extruding structurally non-related compounds such as antimicrobials, bile salts, dyes and heavy metals<sup>14</sup>, CmeABC has been reported to function interactively with CmeDEF<sup>16</sup>; a secondary multidrug efflux pump in *C. jejuni*. Glycoproteomic analysis of *C. jejuni* demonstrated that the CmeABC complex is multi *N*-linked glycosylated where CmeA is glycosylated at positions <sup>121</sup>DFNR<sup>124</sup> and <sup>271</sup>DNNNS<sup>275</sup>, CmeB is glycosylated at position <sup>634</sup>DRNVS<sup>648</sup> and CmeC is glycosylated at position <sup>47</sup>ETNSS<sup>51</sup>. Notably, CmeE has also been shown to be *N*-glycosylated<sup>17</sup>. Previously, we showed that the multidrug efflux pump is impaired in the glycosylation deficient *C. jejuni*. This resulted in a significant increase in ethidium bromide accumulation more than the parent strain and a reduction in antibiotics resistance (Abouelhadid S, *et al* submitted manuscript). We hypothesise that this deficiency may be due to assembly destabilisation as a consequence of glycosylation aberration. To address this question, we sought to study the major multidrug efflux pump of *C. jejuni*, in a glycosylation deficient CmeABC complex. We conducted the experiments in a *C. jejuni* *cmeD::cat<sup>r</sup>* background strain in order to avoid the interaction of CmeDEF with CmeABC that might mask the functional role of *N*-linked glycans. This parent strain was used to construct a *C. jejuni* WTCmeABC strain and a *C. jejuni* glycosylation altered strain;

112 g0CmeABC whereby, N->Q in each glycosylation sequon (D/E-X<sub>1</sub>-N-X<sub>2</sub>- S/T where X<sub>1</sub> and X<sub>2</sub>  
113 are any amino acids other than proline). Since *cmeABC* is an operon, we added a 6x His tag  
114 at the C-terminal of CmeC to monitor changes in CmeABC expression. We then grew both  
115 WTCmeABC and g0CmeABC strains to an OD<sub>600</sub> =0.4-0.5, tetracycline was then added to  
116 inhibit protein synthesis. CmeC levels in both strains were monitored for 2 hours. Our data  
117 show no difference in CmeC expression in WTCmeABC and g0CmeABC strains **Fig 1, A**.  
118 Once inserted in the outer membrane CmeC might be unreachable region to proteases.  
119 Therefore, we conclude that *N*-linked glycans, in this case, do not protect CmeC from  
120 native proteolytic degradation. We observed two bands in the WTCmeC (lanes 2, 4, 6, 8)  
121 that migrated slower than the band corresponding to non-glycosylated CmeC in g0CmeC  
122 (lanes 1, 3, 5, 7). Western blot analysis confirmed that the two bands observed in WTCmeC  
123 lanes correspond to two glycospecies for the protein. **Fig 1, B**. Our bioinformatic analysis  
124 of the primary amino acid sequence shows that CmeC has two glycosylation sequons;  
125 <sup>30</sup>EANYS<sup>34</sup> and <sup>47</sup>ETNSS<sup>51</sup> in *C. jejuni* NCTC11168. Structurally both of the glycosylation  
126 sequons are located in flexible loops<sup>18</sup> **Fig 6, B**.

### 127 ***N*-linked glycans affect multidrug efflux pump efficiency.**

128 To examine the role of *N*-linked glycans in CmeABC molecular assembly, we assessed the  
129 efficiency of the multidrug efflux pump using an ethidium bromide accumulation assay.  
130 Ethidium bromide accumulation was 22% higher in g0CmeABC when compared to  
131 WTCmeABC. This difference was consistent at 5, 10 and 15 minutes, indicating an  
132 impairment in the extrusion of ethidium bromide from g0CmeABC **Fig 1, C**. To confirm this  
133 finding, E-test antibiotic strips were used to calculate the minimum inhibitory  
134 concentration (MIC) of four non-structurally related antibiotics that have different  
135 mechanisms of actions. In comparison to WTCmeABC, an increase in antibiotic  
136 susceptibility was noticed in g0CmeABC confirming the previous finding **Table 1**. The  
137 results indicate that *N*-linked glycans play a role in enabling the multidrug efflux pump to

138 work efficiently in the *C. jejuni* cell.

139 **Generation of fully glycosylated CmeA in glycocompetent *E. coli***  
140

141 Previous studies showed that UDP-N-acetylglucosamine—undecaprenyl-phosphate *N*-  
142 acetylglucosaminephosphotransferase; WecA, could interfere with the biosynthesis of  
143 heterologous expression of polysaccharides built on the undecaprenyl-phosphate lipid  
144 anchor- rendering it built on incorrect glycan at the reducing end. To circumvent this  
145 problem and ascertain that g2CmeA is glycosylated with the native *C. jejuni* *N*-linked  
146 glycan we used glycocompetent *E. coli* SDB1<sup>19</sup>. The heterologous expression of an acceptor  
147 protein with protein glycosylation locus (*pgl*) usually yielded a mix population of  
148 glycosylated and non-glycosylated protein variant, indicating a suboptimal glycosylation  
149 process<sup>20,21</sup>. We observed that *pglB* expression from pACYC(*pgl*) is insufficient to achieve  
150 optimal glycosylation (data not shown). To overcome this bottleneck, we sought boosting  
151 PglB expression by introducing pGXVN114 to *E. coli* SDB1 expressing CmeA and *N*-linked  
152 glycan biosynthetic pathway. **Fig 2** Lane 1 shows the optimal glycosylation of  
153 constitutively expressed CmeA and *N*-linked glycosylation pathway along with IPTG  
154 inducible PglB from pGXVN114 backbone.

155 **Glycosylation modulates protein global structure.**

156 In eukaryotes the enzymatic attachment of *N*-linked glycans to amide group of asparagine  
157 in the glycosylation consensus sequon, is correlated with changes in the biophysical  
158 properties of the protein such as thermostability<sup>3</sup>, aggregation, function<sup>4</sup> and structure<sup>22</sup>.  
159 Glycans can confer interactions not only at the glycosylation site but also other regions in  
160 the protein. Serving as bulky hydrophilic groups, glycans can also favour certain  
161 conformational modifications that stabilise protein structure<sup>22</sup>. Bioinformatic studies  
162 suggested that glycans force the polypeptide chain to adopt a more extended  
163 conformation through restricting residual structures formation in the unfolded state<sup>23,24</sup>.  
164 To investigate the role that *N*-linked glycans play in modulating the biophysical properties

165 of CmeABC, we used circular dichroism (CD) spectroscopy. This allowed us to monitor the  
166 secondary structure as well as the conformational changes upon thermal denaturation of  
167 CmeA variants. Far-UV spectra for both g0CmeA and g2CmeA in 10 mM sodium phosphate,  
168 75 mM sodium chloride, 10% glycerol buffer (pH 8) were collected at 20 °C. The spectrum  
169 exhibited helical structure signature with two negative minima at 208 and 222 nm. It also  
170 showed a positive maximum at 196 nm suggesting the presence of beta-sheets structure  
171 **Fig 3** Superimposed CD spectra exhibit g0CmeA spectrum, shown in black, was slightly red  
172 shifted towards the  $\beta$  sheet. The CD spectra of both proteins were then analysed by  
173 BESTSEL<sup>25</sup> for secondary structure content. **Table 2** shows the secondary structure  
174 content of g0CmeA and g2CmeA at room temperature. Our results show that *N*-linked  
175 glycans confer subtle changes in protein global conformation.

### 176 **Glycans enhances protein thermostability**

177

178 It has been established that *N*-linked glycans play a role in stabilising glycoproteins  
179 thermodynamically in eukarotes<sup>3,22</sup>. The intrinsic role of *N*-linked glycans in stabilising  
180 CmeA was investigated through analysing the CD spectra recorded for g0CmeA and g2CmeA  
181 at elevated temperatures. The multi-wavelength melting profiles monitored at 260-195 nm  
182 were recorded during the heating of g0CmeA and g2CmeA from 6°C to 94°C at 1°C per  
183 minute rate with a 2°C step size. Isodichroic points were observed in the far-UV CD spectra  
184 at **Fig 4, A and B** supports more than two-state nature of the unfolding transition. Derivative  
185 of CD spectra were used to calculate the melting temperature ( $T_m$ ) of both g0CmeA and  
186 g2CmeA **Suppl 1**. The loss of CD spectra was observed upon incremental rises in  
187 temperature, melting curves measured for g0CmeA and g2CmeA show that both proteins  
188 have three transitional phases at  $T_{m1}$  46.1°C  $\pm$  0.2,  $T_{m2}$  53.5°C  $\pm$  0.4 and  $T_{m3}$  56.7°C  $\pm$  0.6 for  
189 g0CmeA and  $T_{m1}$  43.8°C  $\pm$  0.3,  $T_{m2}$  49.3°C  $\pm$  0.2 and  $T_{m3}$  62.8°C  $\pm$  0.2 for g2CmeA. No light  
190 scattering was observed in the UV spectra indicating turbidity presented at high  
191 temperature. This shift in final melting temperature suggests that glycans stabilise g2CmeA

192 at elevated temperature **Fig 4, C**.

193 To confirm the previous findings, we examined conformational folding reversibility and  
194 unfolding rate for both g0CmeA and g2CmeA. The assay is based on three successive cycles  
195 whereby CmeA variants were cooled at 20°C, heated up to the corresponding  $T_m$  for 5  
196 minutes and then cooled again at 20°C. To assess conformational folding reversibility, CD  
197 spectra that were recorded at 20°C, before and after increasing the temperature to the  
198 corresponding  $T_m$  were compared. CD spectra of CmeA variants were superimposable  
199 before and after the first two cycles of heating ( $T_{m1}$  and  $T_{m2}$ ) but not after heating at  $T_{m3}$ ,  
200 indicating conformational changes **Fig 4, D and E**. Unfolding rate was evaluated according  
201 to changes in CD spectra with respect to time at  $T_{m3}$ . A significant reduction in CD spectra  
202 was observed when g0CmeA and g2CmeA were heated at their corresponding  $T_{m3}$ . The  
203 unfolding of CmeA was achieved in 5 minutes at its  $T_{m3}$ . Notably, the CD spectra recorded  
204 for g2CmeA at its corresponding  $T_{m3}$  kept changing for 30 minutes indicating a slower  
205 unfolding rate. This result along with the above data highly suggest that *N*-linked glycans  
206 play a pivotal intrinsic role in protein thermodynamic stabilisation.

### 207 **Glycans modulate molecular assembly and protein-protein interaction**

208 Unlike eukaryotes, there is no evidence that *N*-linked glycans modulate protein- protein  
209 interaction or complex assembly in prokaryotes. To explore the potential role of *C. jejuni*  
210 general *N*-linked glycans in modulating the interaction of glycoproteins with their cognate  
211 partners, surface plasmon resonance (SPR) was used. SPR was previously used to  
212 investigate the interactions in orthologous membrane fusion proteins (MFP) with TolC from  
213 of *E. coli*<sup>26</sup>. Quantitative analysis of the binding curves showed multiple reaction events. The  
214 model used to determine binding kinetics indicated the presence of two populations of MFP  
215 proteins. The two populations exhibited different binding kinetics, notably, fast and slow  
216 dissociation rates that contributed to weak and strong interactions, respectively<sup>26</sup>. We  
217 employed a CM5 chip with g0CmeA and g2CmeA immobilised through amine coupling,



218 CmeC was then injected over CmeA variants surfaces in different concentrations. In our  
219 model, g0CmeA and g2CmeA exhibited multiple events interaction with CmeC. These  
220 interaction events can be attributed to a fast and a slow association and dissociation rates.  
221 Quantitative analysis of the sensogram yielded excellent results for slow interactions  
222 however, fast interactions could not be fitted in a model to generate accurate binding  
223 kinetics. At pH 7.4, both CmeA variants exhibited similar dissociation rate constants ( $k_{off}$ ) of  
224  $9e^{-4} s^{-1}$  for g0CmeA and  $7.5e^{-4} s^{-1}$  for g2CmeA **Fig 5, A and B**. Interestingly, difference in  
225 association rate constant ( $k_{on}$ ) was observed, g0CmeA  $k_{on} = 5e^4 (M^{-1}s^{-1})$  whilst g2CmeA  $k_{on}$   
226  $=1.5e^5 (M^{-1}s^{-1})$ . This difference in the  $k_{on}$  rate indicates that g2CmeA possess more binding  
227 pockets that allows slow yet high affinity interactions with CmeC compared to g0CmeA.  
228 The equilibrium dissociation rate constants ( $K_D$ ) derived from the binding kinetics analysis  
229 were  $1.7e^{-8} (M)$  and  $5e^{-9} (M)$  and g0CmeA and g2CmeA, respectively.

230 To investigate the effect of pH on modulating binding kinetics, we observed CmeA- CmeC  
231 interactions at pH=6.0 **Fig 5, C and D**. At this pH CmeA-CmeC interactions were more avid  
232 and with a greater number of sites bound. Similar to binding curves observed at pH 7.4,  
233 g2CmeA showed a favourable slow association and dissociation binding curves than  
234 g0CmeA. The number of sites for slow interaction were greater for g2CmeA contributing  
235 to a modestly higher affinity for interaction with CmeC compared to a weaker affinity for  
236 CmeC exhibited by g0CmeA. To confirm that variations in binding kinetics were not due to  
237 differences in structural orientation between g0CmeA and g2CmeA, both proteins were  
238 immobilised on NTA chip using C-terminal 6xHis tag, CmeC was then passed in different  
239 concentrations. Binding kinetics indicated similar  $k_{on}$  and  $k_{off}$  for both CmeA variants,  
240 although fewer sites were available **Suppl 2**. Interestingly, g2CmeA bound more CmeC than  
241 g0CmeA, confirming the data seen with amine coupling. These results show a complex  
242 binding pattern between CmeA variants and CmeC. They also suggest an extrinsic role for  
243 *N*- linked glycans, exhibited in the variation in binding kinetics between g0CmeA and

244 g2CmeA, where the glycosylated form of CmeA showed a greater proportion of higher  
245 affinity interaction sites than its non-glycosylated counterpart.

## 246 Discussion

247 Whilst the role of glycosylation in eukaryotes has been thoroughly explored, a similar  
248 depth of investigation is lacking in prokaryotes. The presence of different glycosylation  
249 systems in prokaryotes has been regularly reported<sup>2,7,11-13</sup>. Some have described their  
250 effect in virulence, adhesion and motility by creating genetic knock outs of the  
251 glycosylation machinery<sup>32,33,10-12</sup>. Nonetheless, these reports have not provided in-depth  
252 studies into the direct role that *N*-linked glycans exert on protein function.  
253 Glycoproteomic studies revealed diBacNAc to be conserved across *Campylobacter*  
254 species. Notably, diBacNAc was also found to be at the reducing end of *O*-linked glycans  
255 in *Neisseria gonorrhoeae*, indicating a parallel evolution between *N*-linked and *O*-linked  
256 glycosylation systems in bacteria<sup>8,9,34</sup>. The role of *N*-linked glycans in stabilising major  
257 multidrug efflux pump in *C. jejuni* has been shown to contribute in efficiently extruding  
258 antimicrobials and ethidium bromide. Disrupting glycosylation in CmeABC resulted in  
259 higher accumulation of ethidium bromide and lowering antibiotic MIC in *C. jejuni*. These  
260 differences in activity are not due to the low abundance of CmeABC complex in g0CmeABC  
261 strain **Fig 1, A**. A protein synthesis arrest assay showed that loss of glycosylation did not  
262 promote CmeC proteolytic degradation. This is in agreement with the previous finding  
263 that CmeC protein abundance were equal in *C. jejuni* and *C. jejuni* *pglB::aphA*  
264 (Abouelhadid S, *et al* paper submitted). This result suggests that *N*-linked glycans might  
265 be modulating molecular assembly. Studies on truncated *N*-linked glycans will reveal the  
266 role of each glycostructure, it will also help to understand the role of the conserved first  
267 two glycans between different *Campylobacter* strains.

268 Bioinformatic studies investigating protein structural changes exerted by glycans has been  
269 inconclusive. These studies rely heavily on the *in-silico* analysis of protein structure entries

270 in the protein database bank. Whilst modern advances in crystallographic techniques  
271 pave the way for more structural studies, obtaining glycoprotein structure is still  
272 challenging and remains poorly represented in the protein database bank. Xin *et al*  
273 reported that protein glycosylation causes significant yet unexpectedly subtle changes in  
274 both local and global protein structure (up to 7%)<sup>23</sup>. However, Hui Sun lee *et al* concluded  
275 that *N*-glycosylation causes non-significant changes in protein structure but increases  
276 protein stability likely due to a role played in reduction of  
277 protein dynamics<sup>24</sup>. Experimentally, our initial CD study of CmeA variants showed that  
278 both have the same conformational fold, however they confer subtle structural  
279 differences to the protein **Fig 3, B**. A small shift has been observed in the percentage of  
280 alpha helices and beta sheets between g0CmeA and g2CmeA,  $1.3 \pm 0.2$ . It is still unclear  
281 whether the structural variations are due to local stabilisation resulting from the glycosidic  
282 bond between the asparagine side chain in the glycosylation site and *N*-linked glycans, or  
283 global structural rearrangement due to the interaction of the glycan with other distant  
284 regions in the protein backbone. A structural elucidation of CmeA in its glycosylated and  
285 non-glycosylated might provide insights on the extent of the importance of  
286 conformational changes.

287 It has been suggested that *N*-linked glycans might enhance protein thermostability. The  
288 glycoprotein PEB3 from *C. jejuni* was used to test the stabilisation effect of *N*-linked  
289 glycans. Average melting temperature of PEB3 (K135E) variants were analysed using  
290 SYPRO orange thermofluor. Interestingly, the  $T_m$  of glycosylated PEB3 was shown to be  
291  $4.7^\circ\text{C}$  higher than its non-glycosylated counterpart; PEB3<sup>35</sup>. This comes with an agreement  
292 with CD thermal melts of g0CmeA and g2CmeA. CD thermal melts showed that whilst both  
293 of the CmeA variants have the same apparent unfolding behaviour,  $T_m$  of g2CmeA was  
294  $6.4^\circ\text{C} \pm 0.5$  higher than that of g0CmeA. The three transitional phases of both variants  
295 showed that g2CmeA seems to be responding to a rise in temperature via conformational

296 rearrangements at  $2.4^{\circ}\text{C} \pm 0.1$  lower than g0CmeA **Fig 4, A**. CD spectra recorded after  
297 cooling showed that the structural rearrangements were reversible and the protein could  
298 fold again, suggesting that protein fold/unfolding  $T_{m1}$  and  $T_{m2}$  are reversible for both of  
299 the CmeA variants. Remarkably, the unfolding behaviour of g2CmeA at  $T_{m3}$  was different  
300 to g0CmeA at its correspondent  $T_{m3}$  in the conformational reversibility assay. Time taken  
301 to unfold g2CmeA was at least 5 times more than g0CmeA, thus indicating a  
302 role played by *N*-linked glycans in conferring greater resistance to unfolding **Fig 4, C and**  
303 **D**. We postulate that *N*-linked glycans stabilise g2CmeA through a reduction in the  
304 unfolding rate in g2CmeA, this finding agrees with the observation that eukaryotic *N*-  
305 linked glycans stabilise the hCD2ad through slowing the unfolding rate of the protein 50-  
306 fold when compared to its non-glycosylated counterpart<sup>2</sup>.

307 Owing to the lack of subcellular compartments, the extrinsic role of prokaryotic *N*- linked  
308 glycans in protein-protein interaction has been not fully appreciated. Despite the scarcity  
309 of glycoproteomic data, few molecular assemblies have been reported to have at least one  
310 of its component to be glycosylated<sup>17,31</sup>. We demonstrate a potential extrinsic role of *N*-  
311 linked glycans in CmeA interaction with CmeC. In an orthologous multidrug efflux pump;  
312 AcrAB-TolC, AcrA showed the presence of two populations, of the same protein, interacting  
313 with different kinetics to TolC. The two populations contributed to a fast weak interaction  
314 and slow strong interaction **Fig 5, A and B**. The complexity of these interactions is  
315 exaggerated in *C. jejuni* due to the presence of *N*-linked glycans, that could modulate  
316 interaction of CmeA with CmeC. Quantitative analysis for the interaction kinetics of CmeA  
317 variants with CmeC showed that, *N*-linked glycans increase the binding affinity to CmeC by  
318 3.4-fold. That was clearly demonstrated in the difference in  $K_D$  between CmeA variants at  
319 pH= 7.4. The difference in binding affinity was confirmed when CmeA variants were  
320 immobilised with the same orientation on Ni chip. Recently, a pseudoatomic structure  
321 provided a detailed picture of interaction between AcrA and TolC. This elaborated the

322 adaptor bridging-binding model that involved an intermesh cogwheel-like binding between  
323 AcrA and TolC<sup>36</sup>. The conserved binding motif Val-Gly-Leu/Thr (VGL) is located at the tip  
324 region of the coiled coil  $\alpha$ -hairpin of the protein, serving as a site of interaction with the  
325 RXXLXXXXXS (RLS) motif of AcrA<sup>36</sup>. In light of this study, our computational analysis  
326 showed that CmeC from *Campylobacter spp* does contain a truncated VGL  
327 motif, denoted VGA, whilst we found the RLS motif to be conserved in among *C. jejuni*, *C.*  
328 *lari*, *C. coli* and *C. fetus* **Fig 6, A**. To understand whether *N*-linked glycans modulate protein-  
329 protein interaction we analysed the proximity of glycosylation sites to VGA and RLS binding  
330 site in both CmeC and CmeA, respectively. The glycosylation sites in CmeC were shown to  
331 be distant from the proposed binding site **Fig 6, C** and probably closer to the  
332 transmembrane domain of the protein. Remarkably, we found that one of the glycan  
333 modified asparagine (<sup>123</sup>N) is at the X<sub>-1</sub> position to RLS motif and is conserved in *C. jejuni*  
334 and *C. coli*, but not in *C. lari* and *C. fetus* **Fig 6, A and C**. This strongly suggests that the  
335 localisation of *N*-linked glycan adjacent to RLS might be affecting either the local site  
336 conformation and/or promote a stronger interaction with the VGA motif in CmeC; resulting  
337 in the interaction kinetics differences between g2CmeA and g0CmeA with CmeC observed  
338 by SPR in this study. In eukaryotes, it is established that *N*-linked glycans at different  
339 glycosylation sites in the same protein could play different roles. The roles of these *N*-linked  
340 glycans can be categorised into; (a) promoting protein folding, (b) modulating protein  
341 trafficking and localisation and (c) effecting protein functionality.

342 This study provides the first detailed analysis of the role of bacterial *N*-linked glycan. The  
343 role of bacterial general *N*-linked glycans has been difficult to elucidate. This led to a notion  
344 that bacterial general *N*-linked glycans do not play any role in protein folding or function<sup>39</sup>.  
345 This notion was based on previous inconclusive results on the role of bacterial general *N*-  
346 linked glycans in modulating proteins function<sup>37-40</sup>. Our work refutes this widely held notion  
347 and demonstrates that bacterial *N*-linked glycans do not only play a role in slowing protein

348 unfolding process and enhancing its thermostability but also it modulates protein  
349 interaction with its cognate partner. It also demonstrates a conserved role of general *N*-  
350 linked glycans previously seen in eukaryotes. This also suggests a common evolutionary role  
351 that led to the emergence of *N*-linked protein post translation modification, in expanding  
352 the functionality of proteome repertoire across all domains of life. Our proposed model can  
353 be used to interrogate prokaryotic general glycosylation systems Our proposed model can  
354 be used to interrogate prokaryotic general glycosylation systems and help in the  
355 development of novel antimicrobials.

356

357

358

359

360

361

362

363

364

365

366

367

368

369

370  
371  
372

**Fig 1**

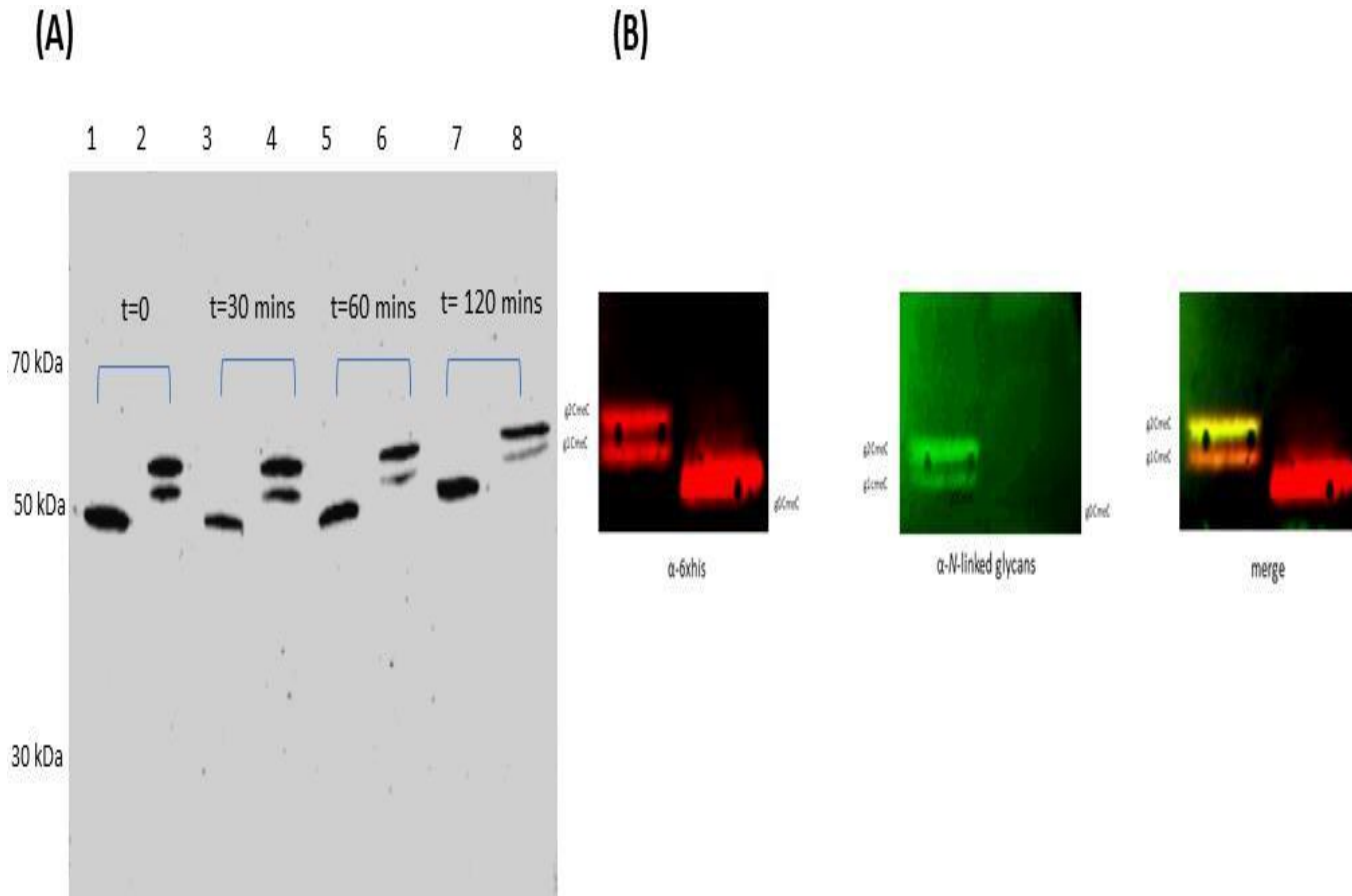

373  
374  
375  
376  
377  
378  
379  
380  
381  
382  
383  
384  
385  
386

387

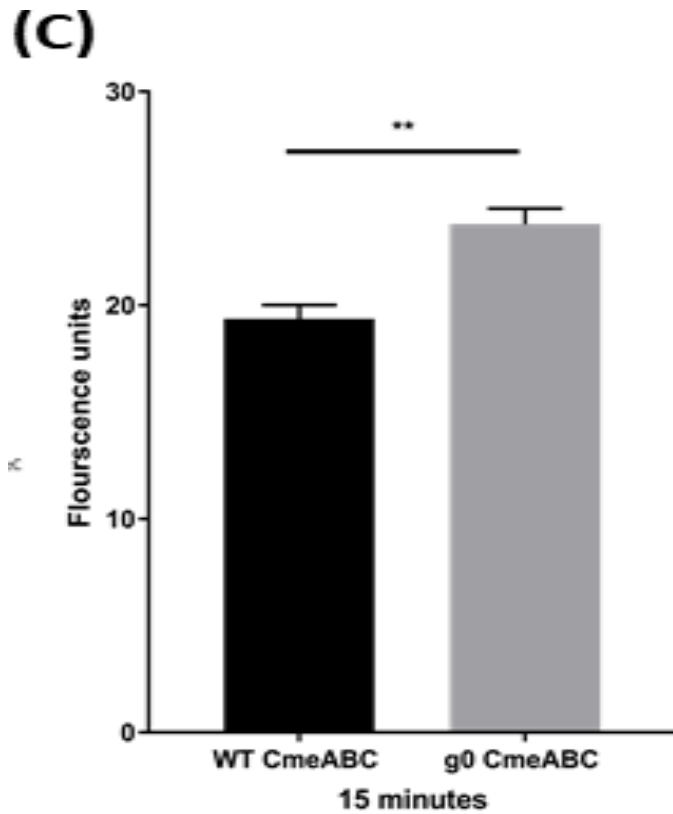

388 **Fig 1** Functional studies and effect of glycosylation on WTCmeABC and g0CmeABC

389

390

391

392

393

394

395

396

397

398

399

400

401

402

(A) Proteolytic degradation assay of CmeC and gCmeC. Cells were grown to  $OD_{600}$  =0.4 then Chloramphenicol and Tetracycline were added. Initial sample were withdrawn and labeled  $t=0$ , then samples were taken every 30 minutes. Cells were stored on ice, centrifuged, lysed by sonication then incubated with 2% SDS and Sodium sarkosyl for 2 hours at room temperature. Cells debris were then pelleted by centrifugation and supernatants were mixed 1:1 with Laemmli loading buffer supplemented with DTT. Proteins were then separated by SDS-PAGE followed by electroblotting to PVDF membrane, 6xhis tagged CmeC was probed by 1ry anti-6xhis mouse antibody and visualized by Li-COR odyssey. Equal amount of proteins was loaded, lane 1, 3, 5, 7, *C. jejuni* g0CmeC; lane 2, 4, 6, 8 *C. jejuni* WTCmeABC (B) Western blot detection of CmeC variants, lane 1, g2CmeC; lane 2, g0CmeC. Proteins were detected with anti-6xHis antibody and *N*-linked glycans were detected with SBA



403 lectin-biotin. (C) Ethidium bromide accumulation test in *C. jejuni* strains. 30 ml  
404 Brucella broth was separately inoculated with overnight culture of *C. jejuni*  
405 WTCmeABC (black) and *C. jejuni* g0CmeABC (grey) to O.D<sub>600</sub> 0.1. Cells were grown till  
406 O.D<sub>600</sub> 0.4-0.5 then spun down, washed and resuspended to OD<sub>600</sub> 0.2 in 10 mM  
407 sodium phosphate buffer pH 7. Cells were then incubated in VAIN for 15 minutes at  
408 37°C then Ethidium bromide was added to final concentration of 0.2 mg/ml.  
409 Fluorescence was read at excitation and emission for 20 minutes at 37°C  
410 accumulation in *C. jejuni* strains at 15 minutes. The data represents the mean of three  
411 biological replicates, two technical replicates each. Significance was calculated using  
412 Mann-Whitney test. \*\**P*<0.005

413  
414  
415  
416

417 **Table 1**

418 **Table 1** Minimum inhibitory concentration in *C. jejuni* strains.

| Antibiotics   | Concentration range (µg/ml) | <i>C. jejuni</i> WTCmeABC | <i>C. jejuni</i> g0CmeABC | Fold difference |
|---------------|-----------------------------|---------------------------|---------------------------|-----------------|
| Ampicillin    | 256–0.015                   | 4                         | 2                         | 2               |
| Erythromycin  | 256–0.015                   | 0.25                      | 0.12                      | 2               |
| Ciprofloxacin | 32–0.002                    | 0.06                      | 0.03                      | 2               |
| Tetracycline  | 256–0.015                   | 0.5                       | 0.25                      | 2               |

422  
423

424 **Table 1** Minimum inhibitory concentration in *C. jejuni* strains. The minimum  
425 inhibitory concentration (MIC) of *C. jejuni* WTCmeABC and *C. jejuni* g0CmeABC  
426 was read directly from the strip at the point where the zone of inhibition of  
427 bacterial growth intersected with the antibiotic concentration on the strip. The  
428 results presented are the mean from three biological replicates two technical  
429 replicates each.

430  
431  
432  
433  
434  
435  
436  
437  
438

**Fig 2**

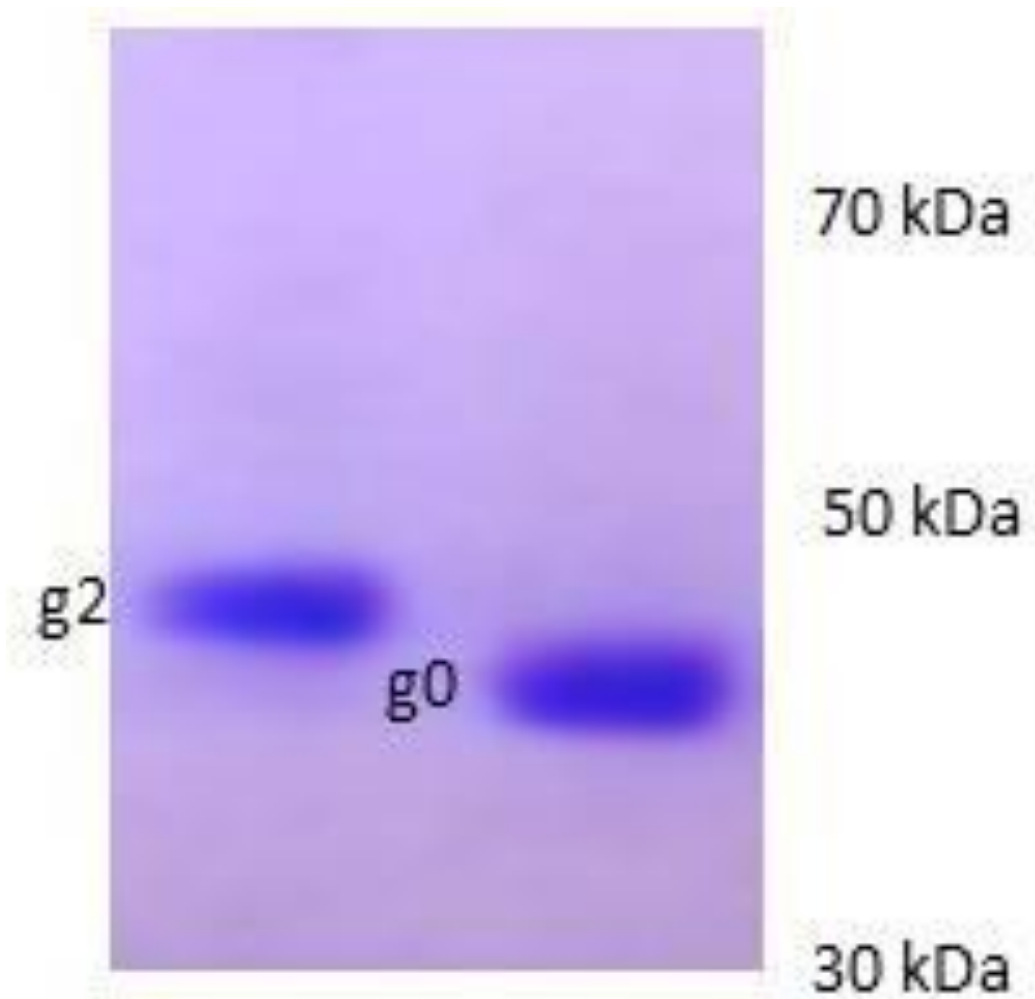

439  
440  
441

442 **Fig 2** Generation of fully glycosylated CmeA in *E. coli* SDB1. CmeA variants were  
443 purified using IMAC followed by concentration and buffer exchange using Amicon  
444 ultra-0.5 ml centrifugal filter units. Proteins were then separated by SDS-PAGE  
445 and visualized by Coomassie blue staining.

446  
447  
448

**Fig 3**

449  
450  
451

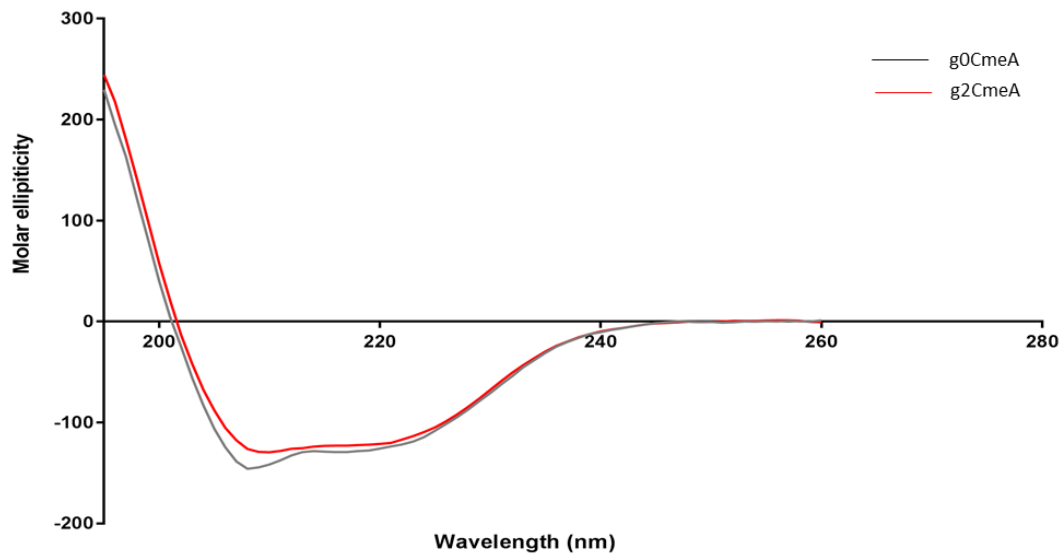

452  
453

454 **Fig 3** CD spectra of g0CmeA and g2CmeA in 10 mM sodium phosphate, 75 mM  
455 sodium chloride and 10% glycerol (pH 8.0). Far-UV CD spectra was collected for  
456 g0CmeA (0.124 mg/ml) and g2CmeA (0.174 mg/ml) variants in 0.5 mm  
457 rectangular cell path length. Molar ellipticity was calculated and corrected for  
458 proteins concentration.

459  
460  
461  
462  
463  
464  
465  
466  
467  
468  
469  
470  
471  
472  
473  
474  
475  
476

477  
478  
479  
480  
481  
482

**Table 2**

**Table 2** Secondary structure calculation of g0CmeA and g2CmeA variants

|        | $\alpha$ -helix | $\beta$ -sheets | Turn  | Others |
|--------|-----------------|-----------------|-------|--------|
| g0CmeA | 29.6%           | 26.4%           | 11.9% | 32.1%  |
| g2CmeA | 28.1%           | 27.2%           | 10.7% | 34.0%  |

483  
484  
485  
486

487 **Table 2** Secondary structure calculation of g0CmeA and g2CmeA variants. CD  
488 units were converted to delta epsilon units and loaded to BESTSEL server.  
489 Although the conformations of both proteins are structurally similar, there is a  
490 subtle shift in the alpha helices and beta sheets ratios between both variants.

491  
492  
493  
494  
495  
496  
497  
498  
499  
500  
501  
502  
503  
504  
505  
506  
507  
508  
509  
510  
511  
512  
513  
514  
515  
516  
517  
518

519  
520

Fig 4

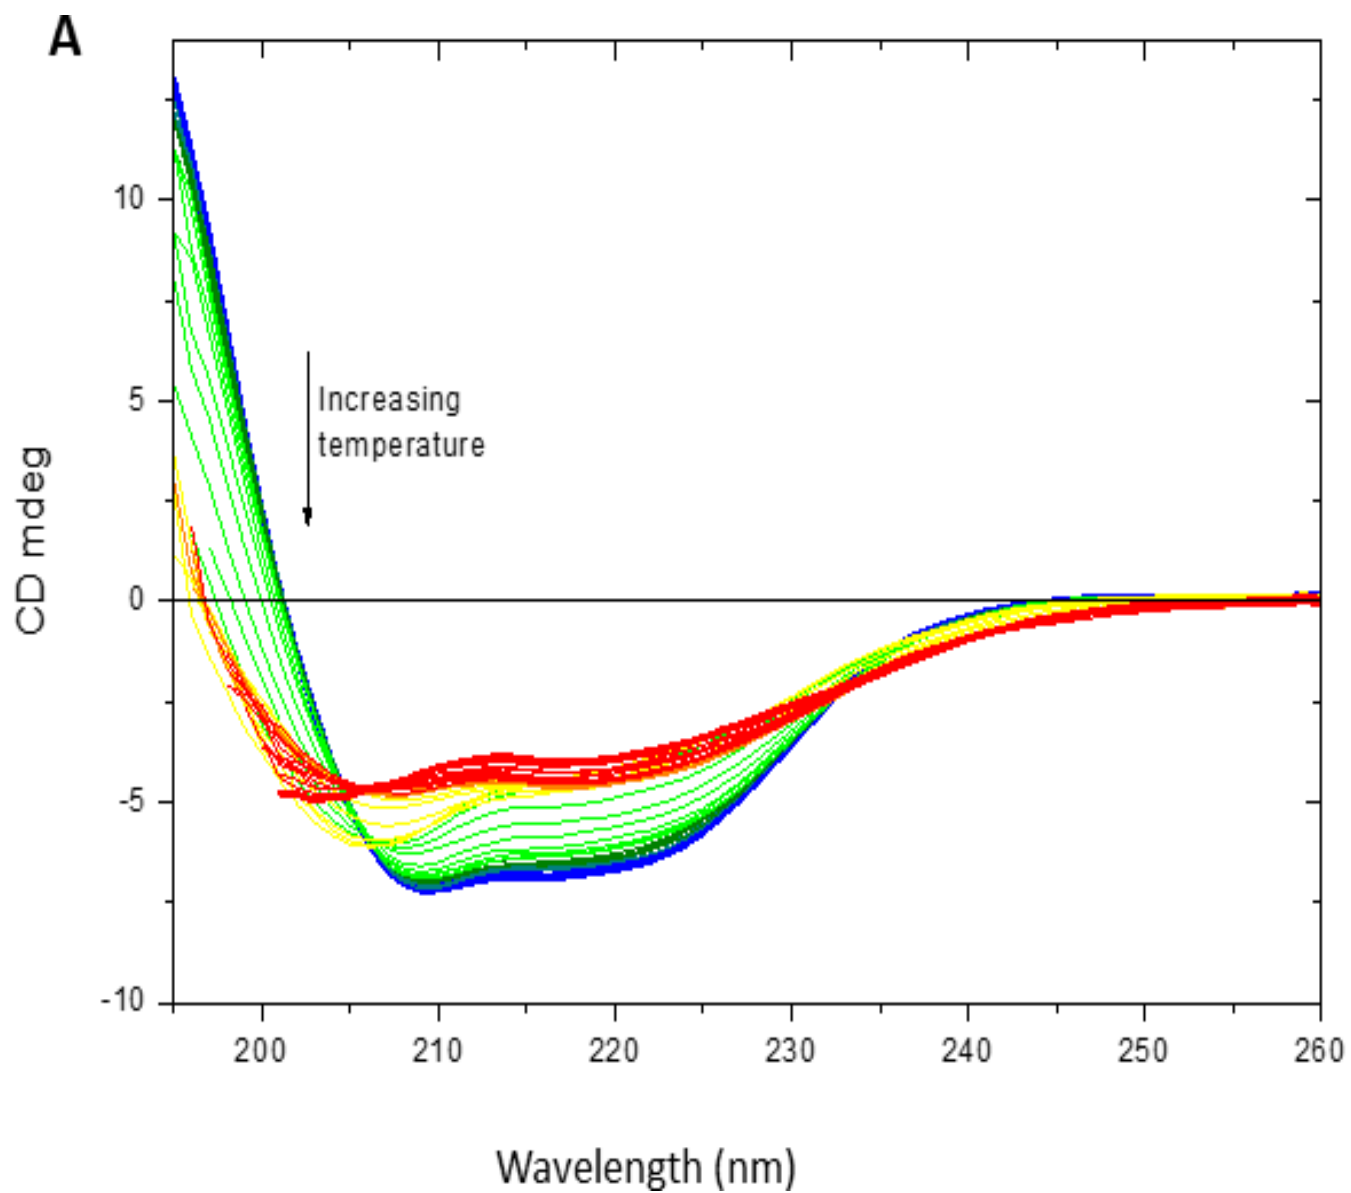

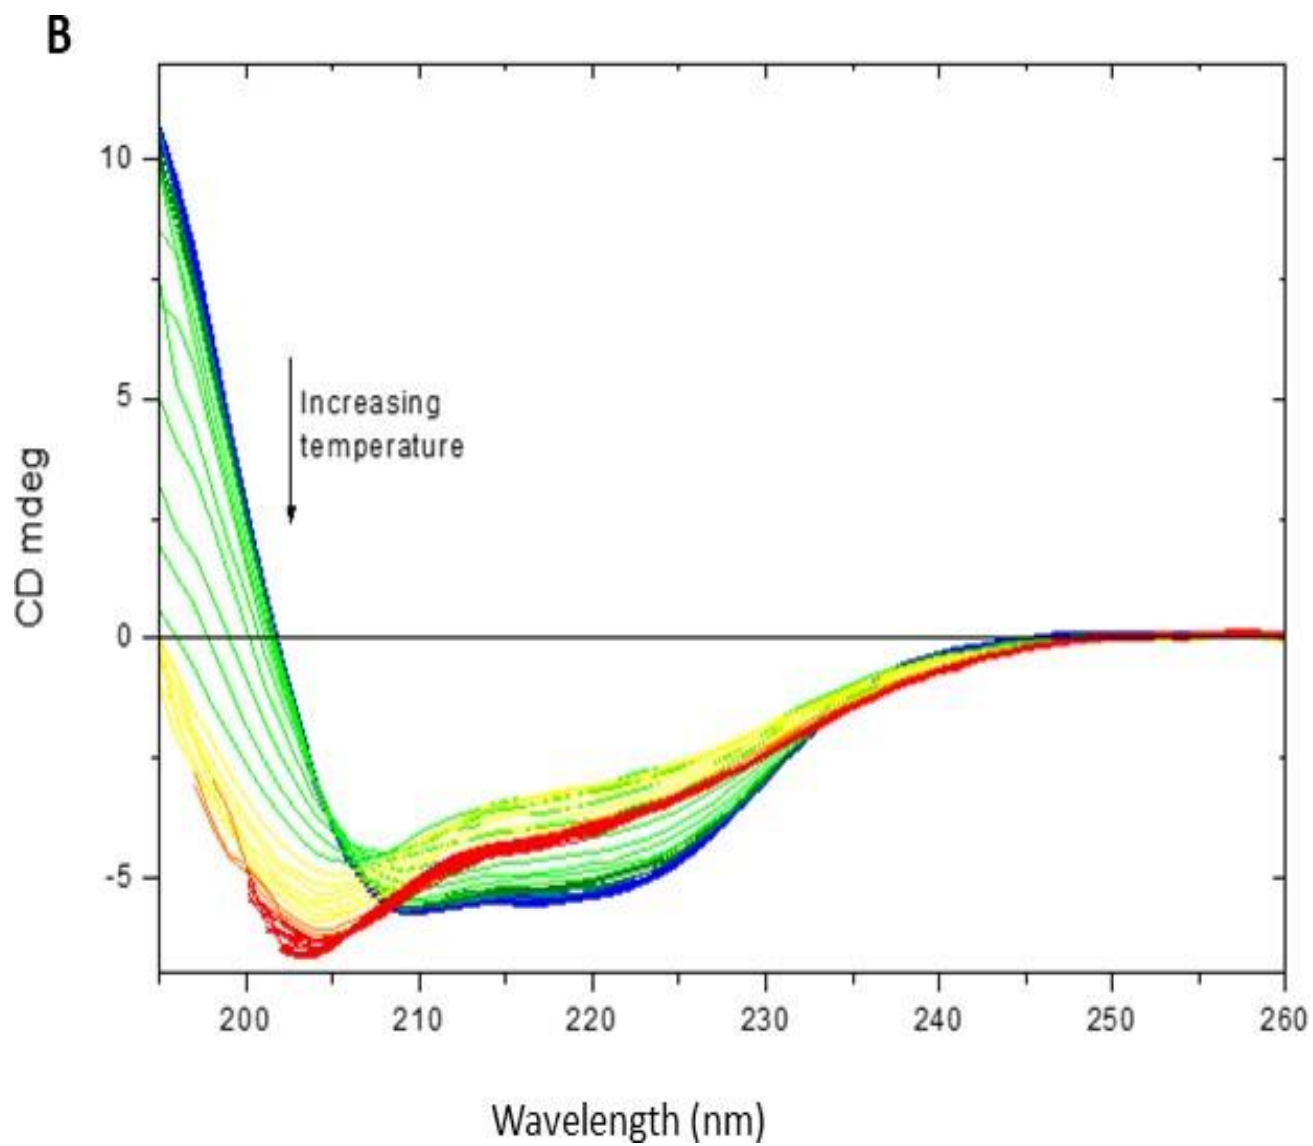

C

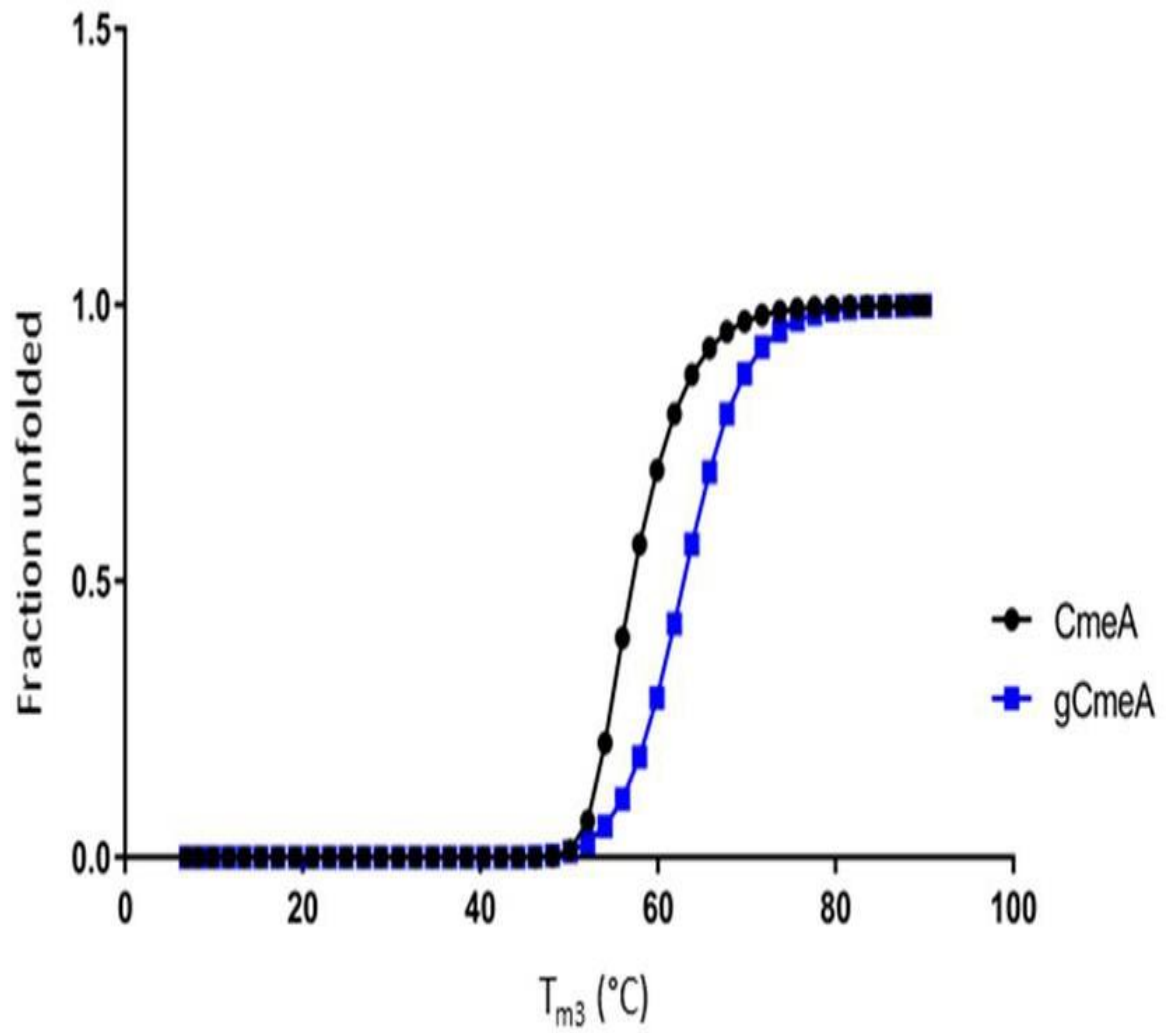

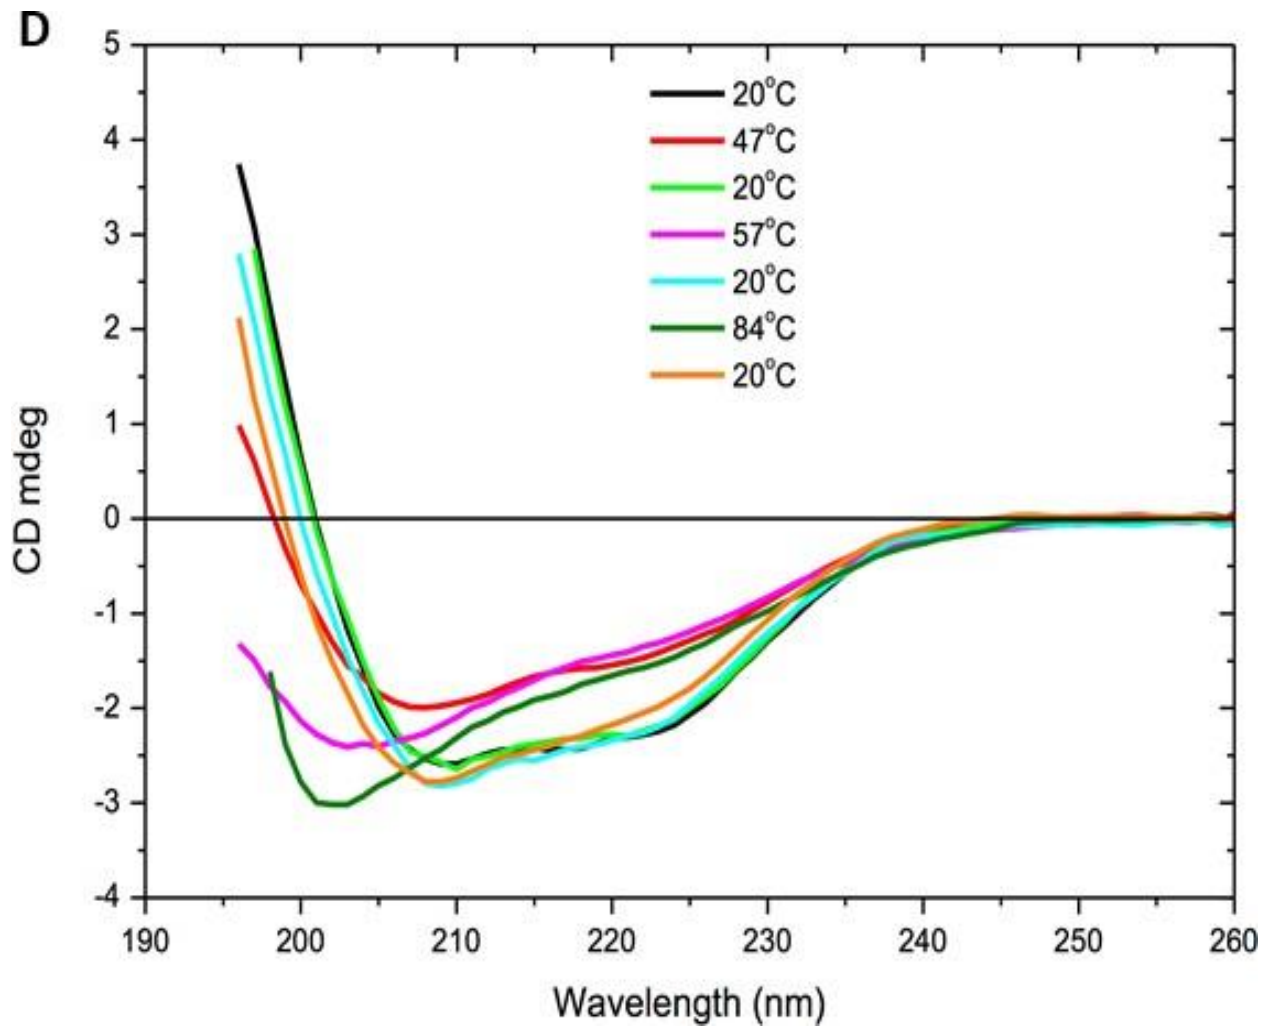

537  
538  
539  
540  
541  
542  
543  
544  
545  
546  
547



548

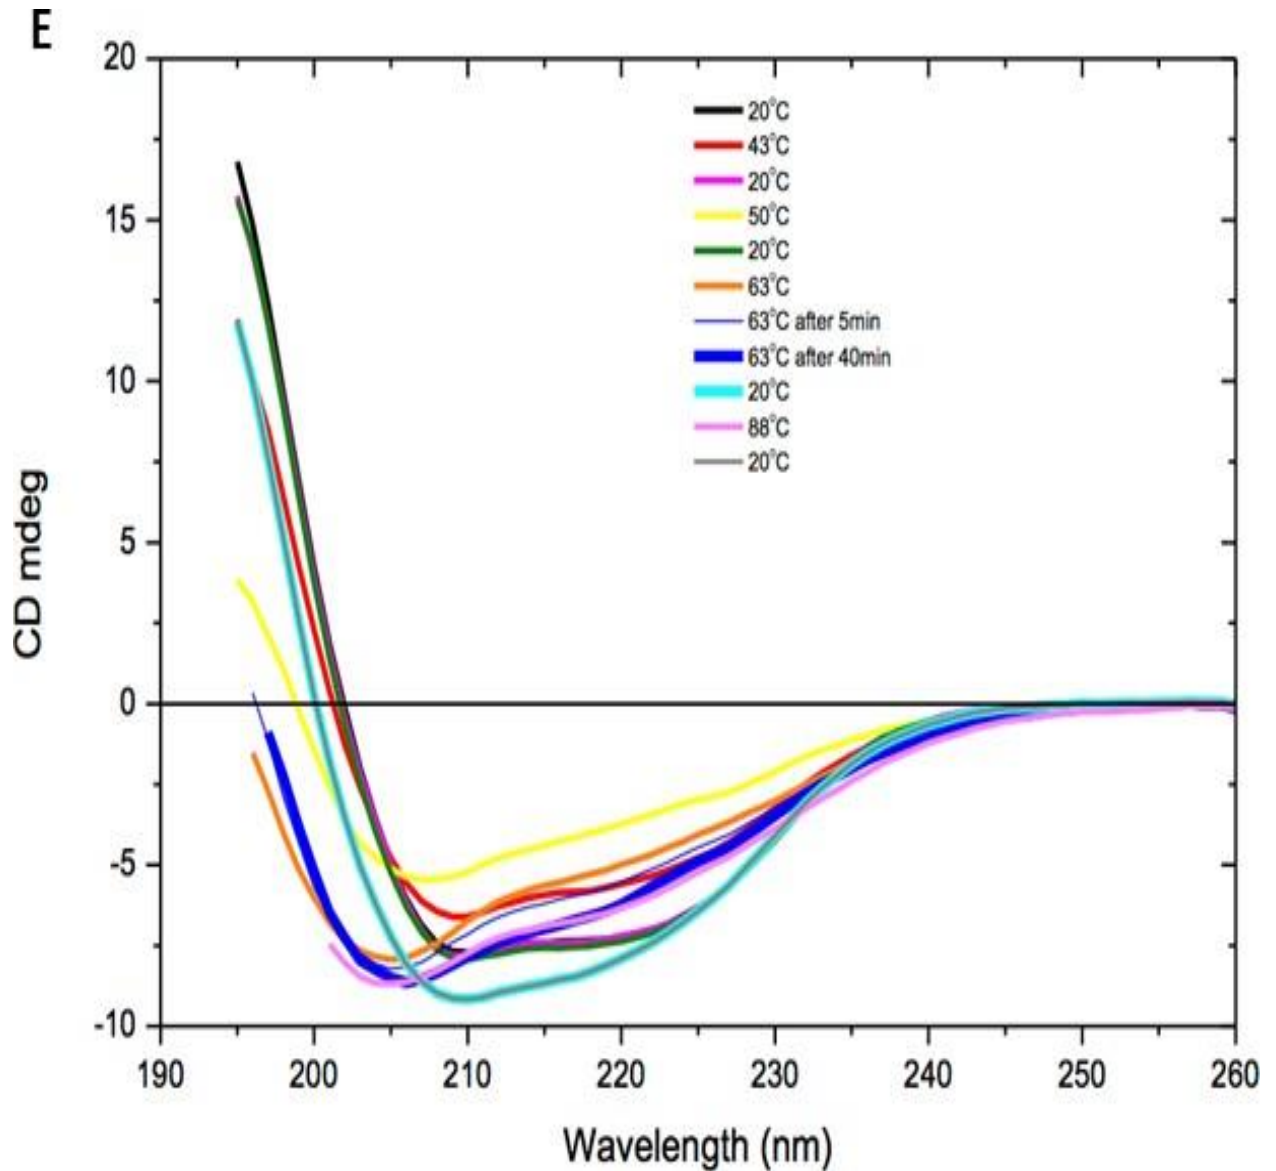

549 **Fig 4** Thermal melts of g0CmeA and g2CmeA in 10 mM sodium phosphate, 75  
550 mM sodium chloride and 10% glycerol (pH 8.0). Far-UV CD spectra was collected  
551 for g0CmeA (0.124 mg/ml) and g2CmeA (0.174 mg/ml) variants in 0.5 mm  
552 rectangular cell path length. CD mdeg were recorded as a function of  
553 temperature from blue (6 °C) to red (94 °C) for g0CmeA, (A) and g2CmeA (B).  
554 Each colour in between was obtained at rate 1 °C per minute with a 2 °C stepwise  
555 increase. CD spectra to assess  
556 the reversibility of thermal unfolding study was recorded at 20°C, raised to  $T_m$   
557 and re-cooled to 20°C sequentially. CD spectra was collected for 5 minutes at

558 each temperature interval for g0CmeA, (C); Thermal denaturation of CmeA  
559 (black) and g2CmeA (blue) as change of ellipticity values upon temperature  
560 increase (D); g2CmeA (E). CD spectra of g2CmeA was stabilised after 30 minutes  
561 at  $T_{m3}$  indicating a more resilient behaviour thermal unfolding process.

562  
563  
564  
565

Fig 5

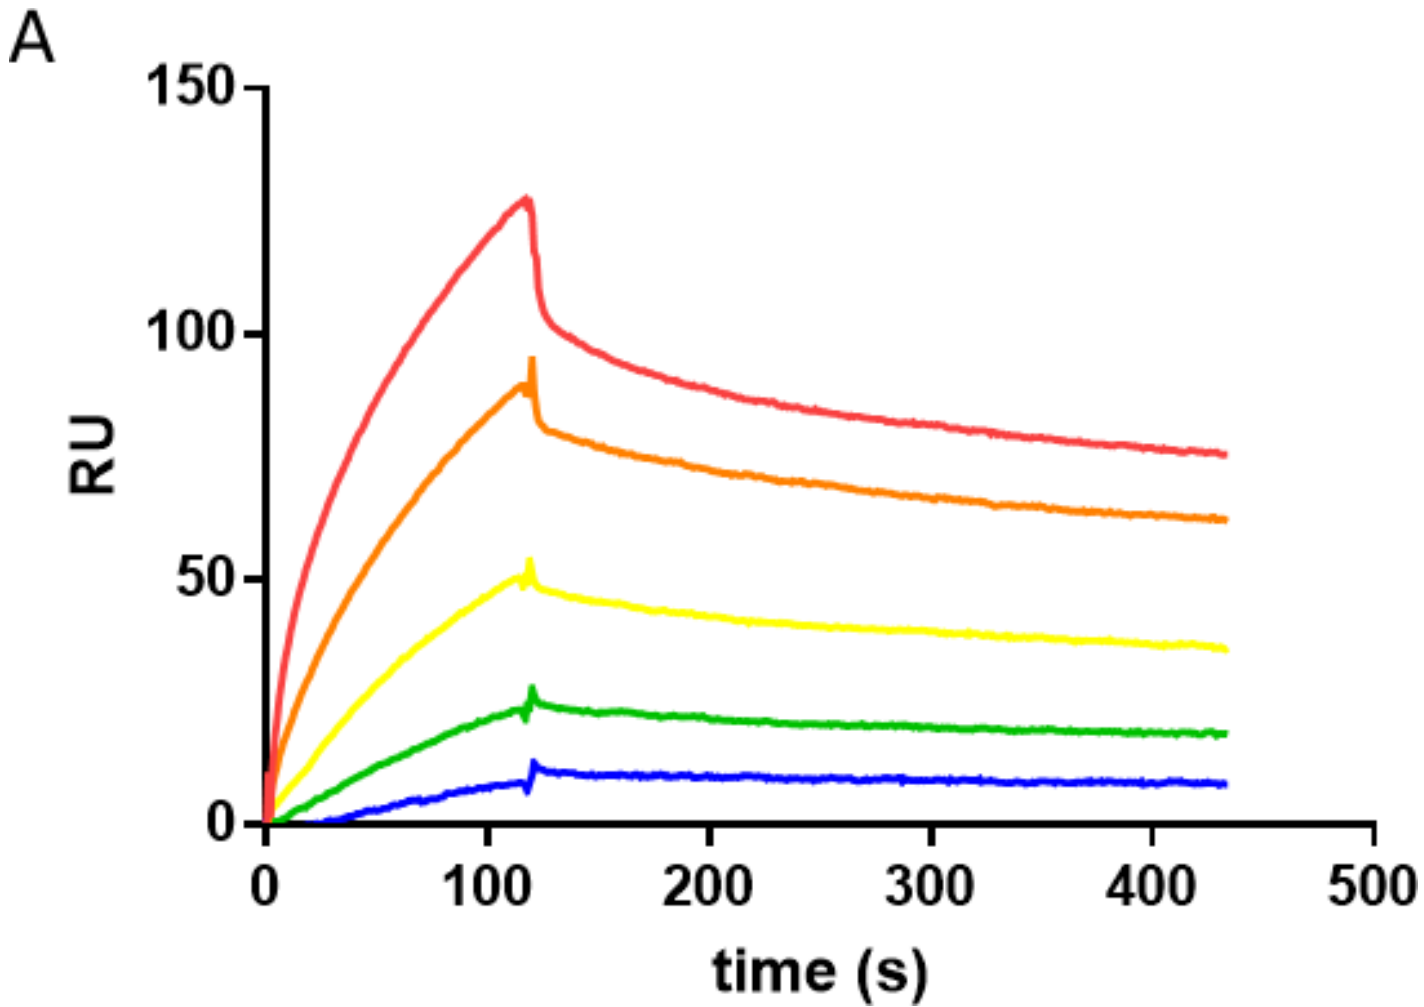

B

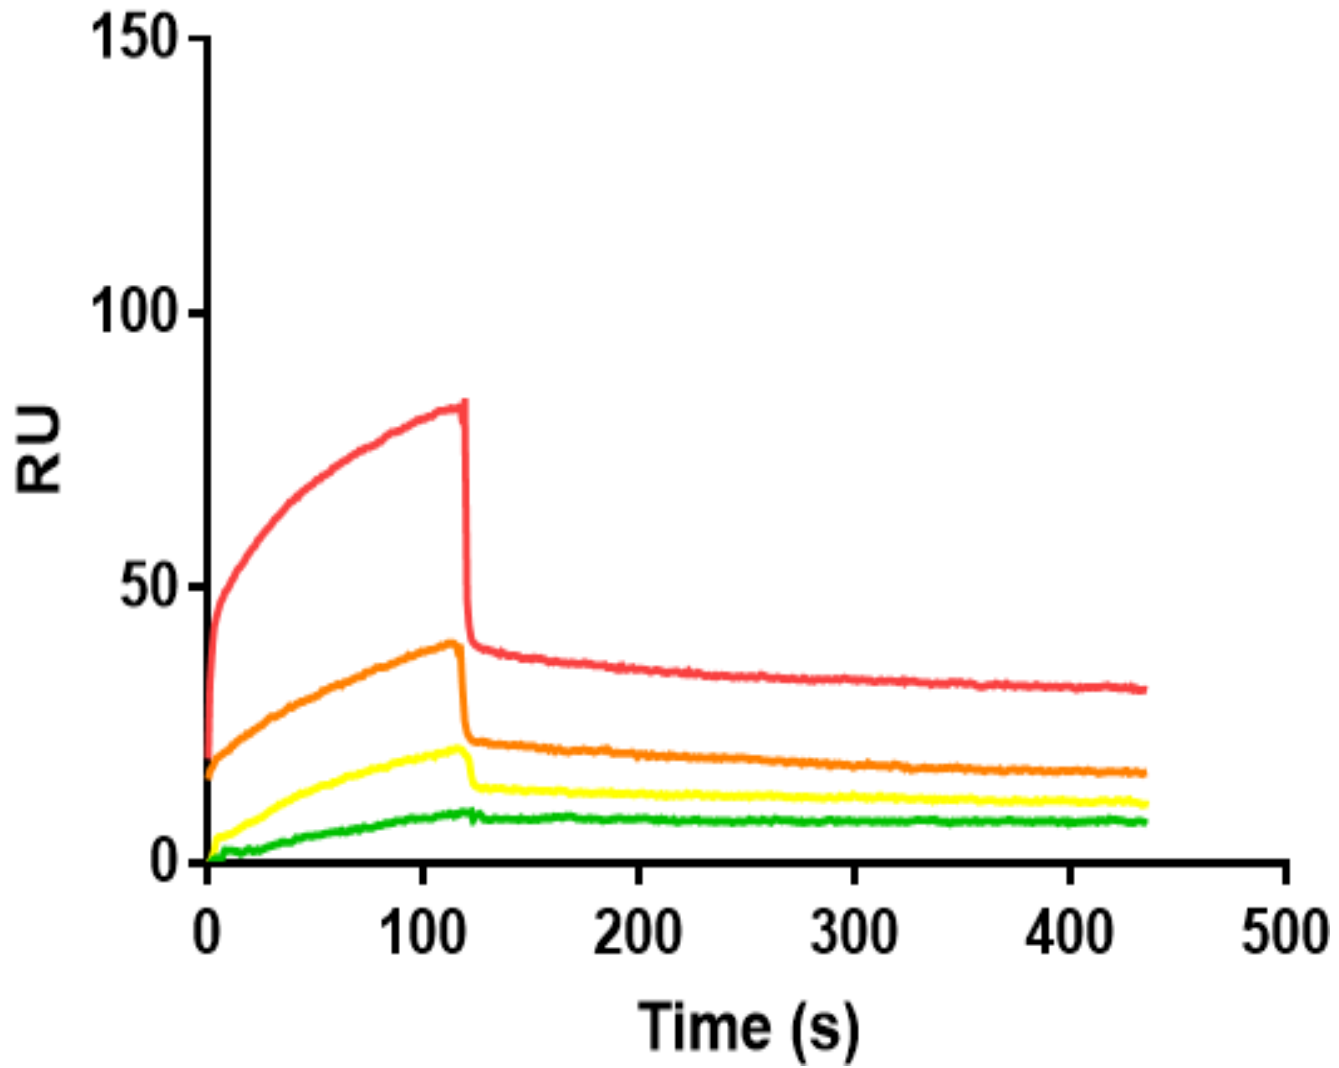

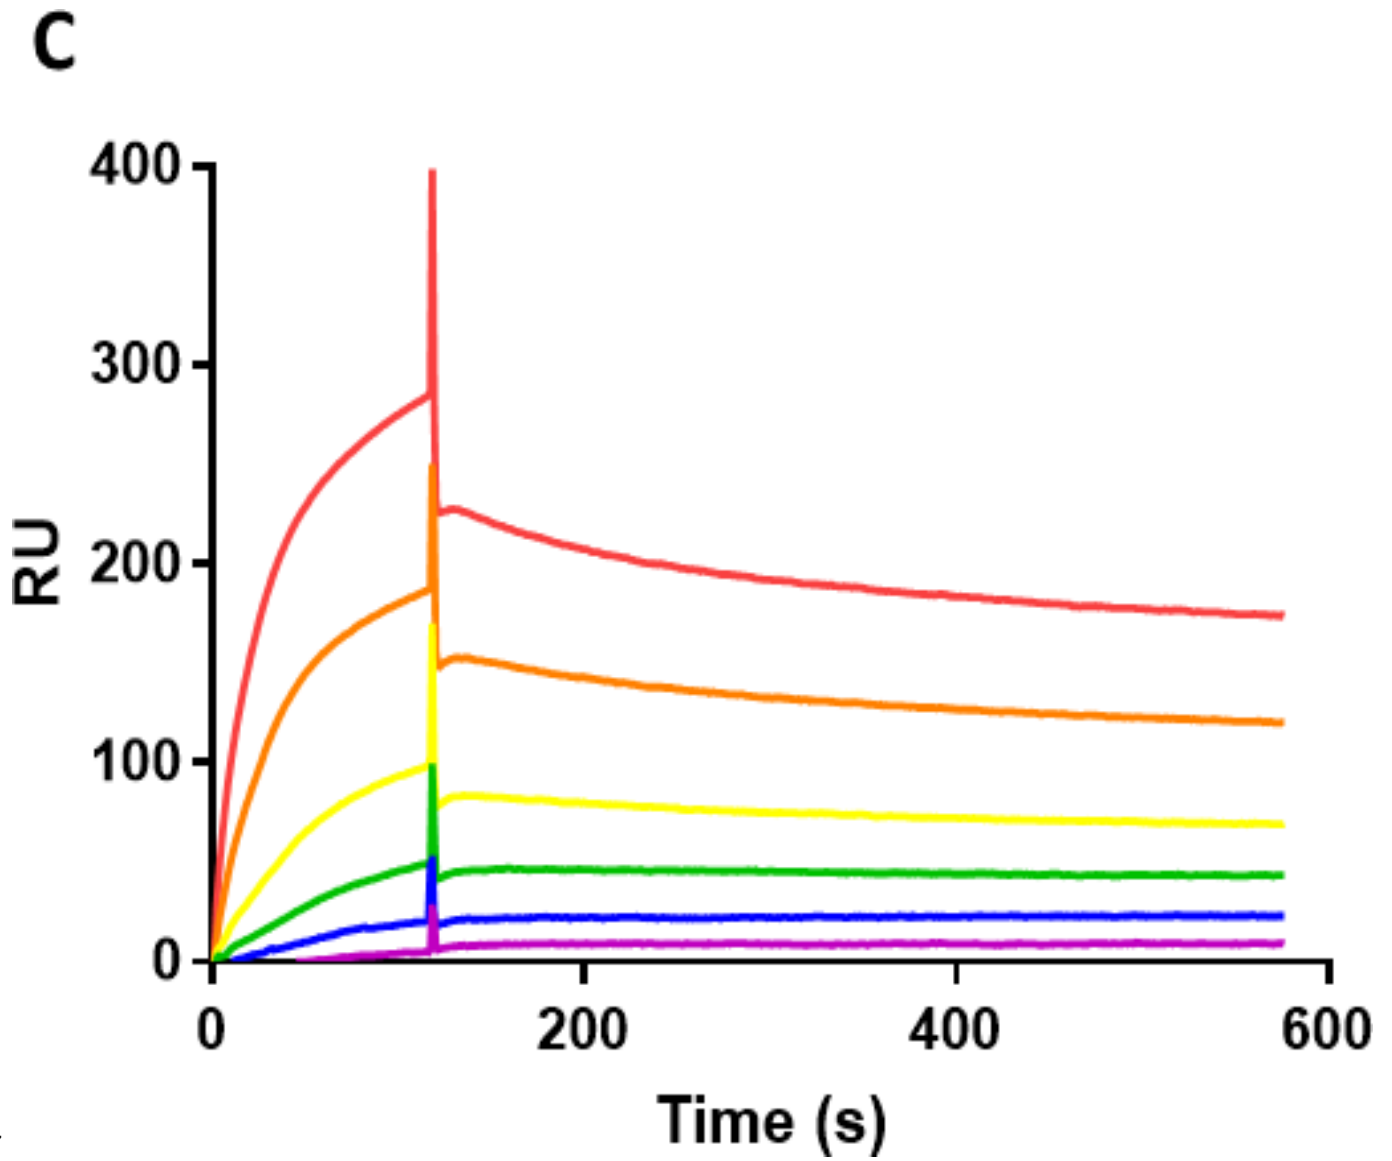

577  
578  
579  
580  
581

D

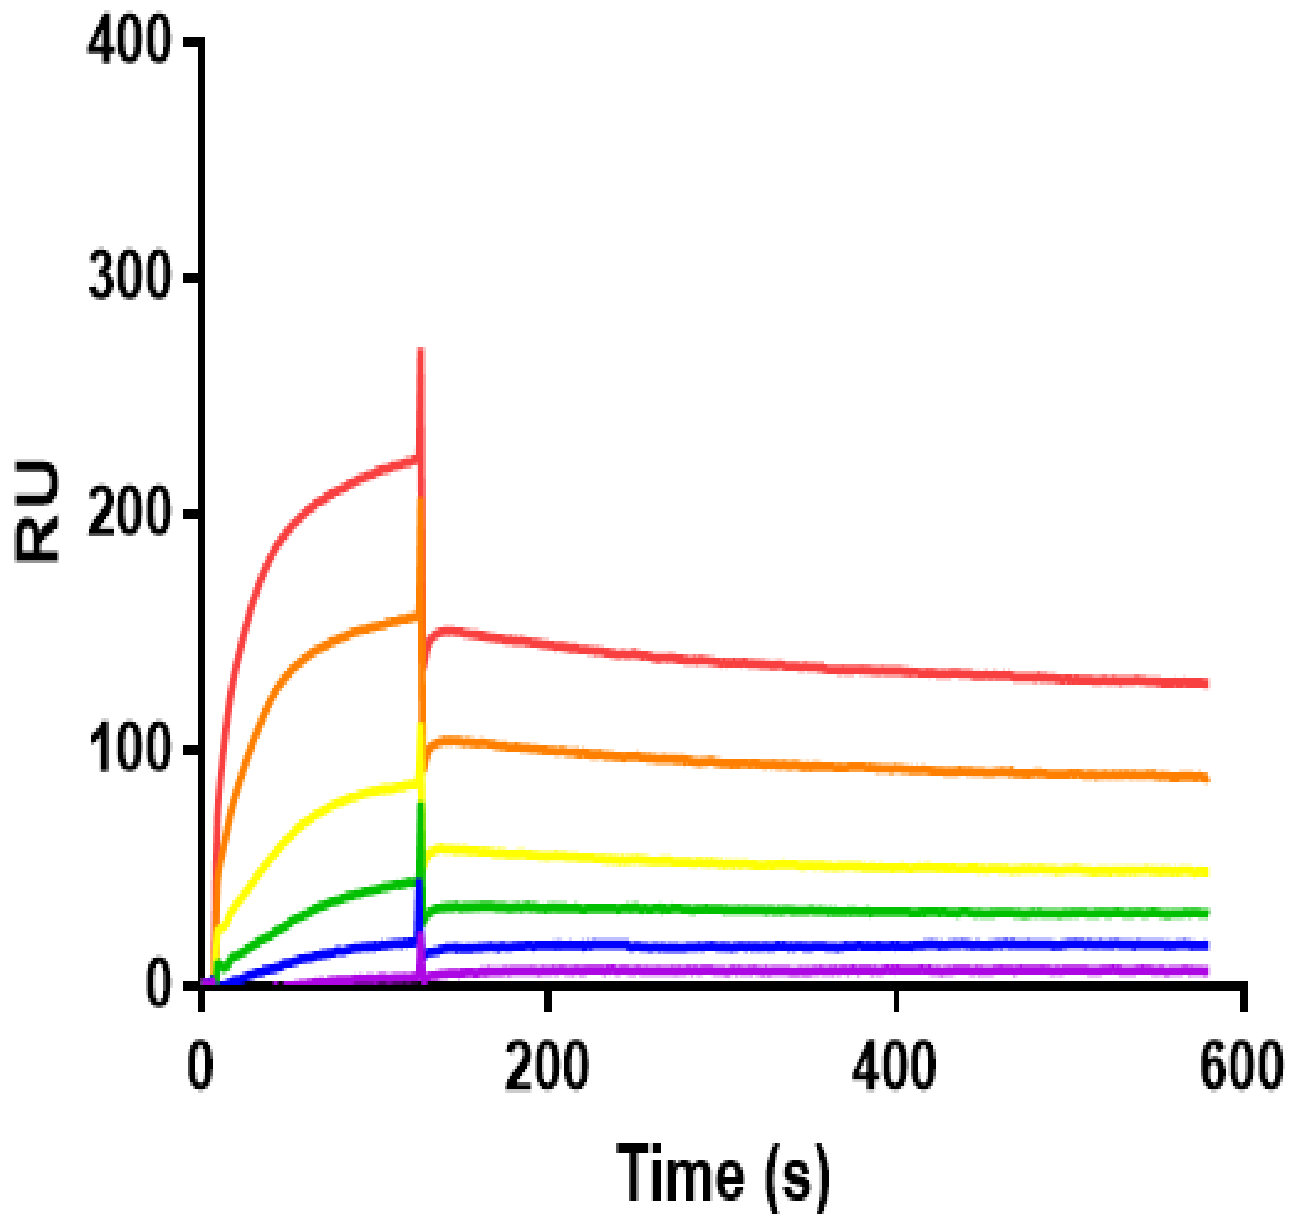

582  
583

584 **Fig 5** Glycosylation enhances interactions between CmeA variants and CmeC.

585 SPR analysis of CM5 chip with A) 900 RU of g2cmeA immobilised and B) 1040 RU

586 of g0cmeA immobilised. Association of CmeC at pH 7.4 was performed for 2 mins

587 and dissociation was followed for 5 mins. Concentrations of CmeC were two-

588 fold dilutions from  $2 \times 10^{-7}$  M (red) to  $1.25 \times 10^{-8}$  M (blue) or  $2.5 \times 10^{-8}$  M (green). SPR

589 analysis of CM5 chip at pH 6.0 with C) 900 RU of g2CmeA immobilised and D)

590 1040 RU of g0CmeA immobilised. Association of CmeC was performed for 2 mins  
 591 and dissociation was followed for 5 mins. Concentrations of CmeC were two-  
 592 fold dilutions from  $2 \times 10^{-7}$  M (red) to  $0.6 \times 10^{-8}$  M (purple)

593  
 594  
 595

Fig 6

**A**

```

AcrA      ---CDDKQAQGGQMPA--VGVVTVKTEPLQITTELPGRTSAYRIAIEVRPQVSGIILKR
MexA      ---CGKSEA-PPPAQTPE--VGIVTLEAQTVTLNTELPGRTNAFRIAIEVRPQVNGIILKR
CmeA C. fetus  CLGSDNKKS-AAQQQIPMPVTVMQAQKMGDIPVLSFNGQTVSDMDVVLKAKVAGTIEKQ
CmeA C. lari   ---CSDDKN-AQVKQLPPQPVNINTMQSANLPLEFTYPARLSTDLDVVIKPKVSGEIKAK
CmeA C. jejuni ---CSKE-E-APKIQMPFPQVTTMSAKSEDLPLSFTYPAKLVSDDYDVIKPKQVSGVIENK
CmeA C. coli   ---CSKE-E-APQKQTPPQSVSTMSAKAENLPLNFTYPAKLVSDDYDVIKPKQVSGVIVEK
          ....      * * * : : : : . : : . : : * * * :

AcrA      NFKEGSDIEAGVSLYQIDPATYQATYDSAKGDLAKAQAAANIAQLTVNRYQKLLGTQYIS
MexA      LFKEGSDVKAGQQLYQIDPATYEADYQSAQANLASTQEQ-----AQRYKLLVADQAVS
CmeA C. fetus  FFKAGASVKEGDKLYQIDEAKYRAAYDSAFANLQVSQANLKNAESDFDRAKKLQEKSAIS
CmeA C. lari   YPKSGQAVKKGDKLFLIEPDKYQASVNMAYGDALVARANFDDAEKNFKRDQILIEKNAIS
CmeA C. jejuni LFKAGDKVKKGQTLPIIEQDKFKASVDSAYGQALMAKATFENASKDFNRSKALFSKSAIS
CmeA C. coli   LFKAGDLIKKGQTLPIIEQDKFKASVNSAYGKALMARANFDNASKDYNRSKTLYNKGAIS
          ** * : : * * : * : . : * : * .. : : . * : * : *
          RXXXLXXXXXXXXS
    
```

**B**

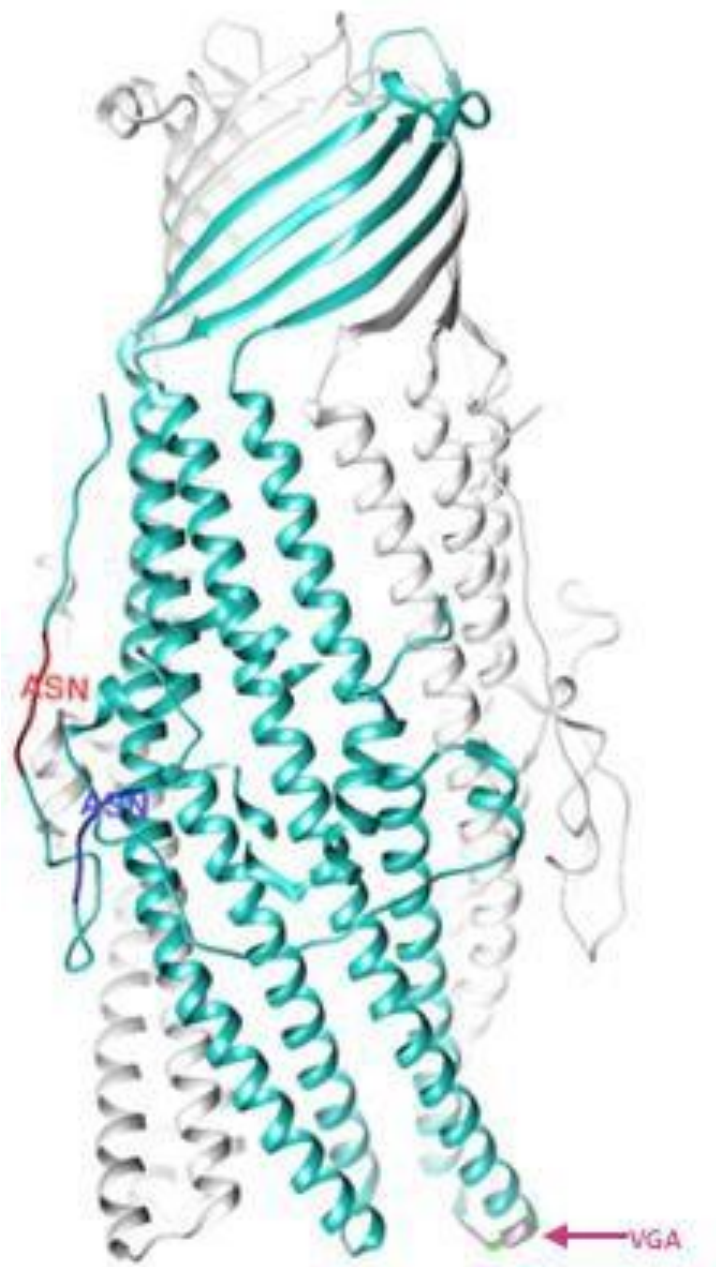

**C**

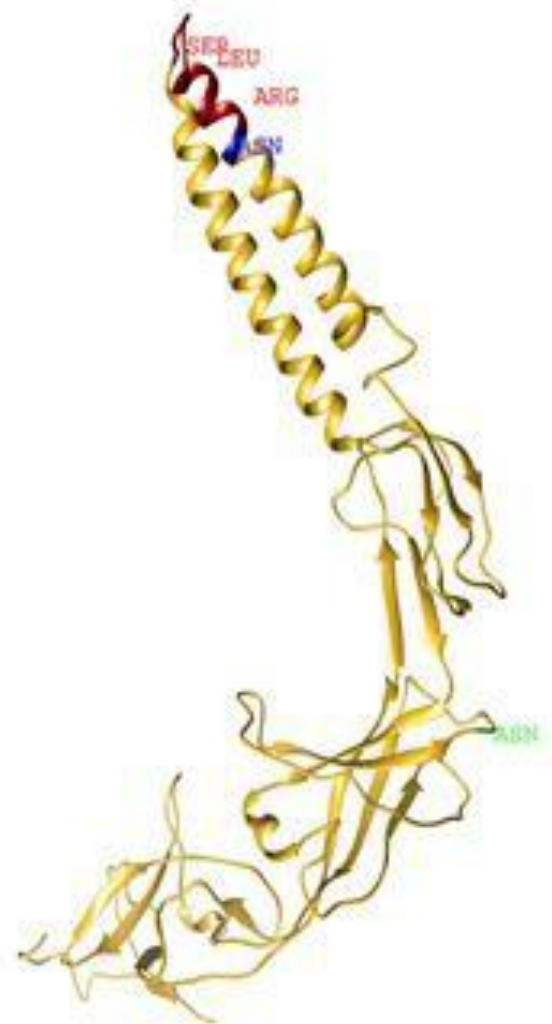

605

**D**

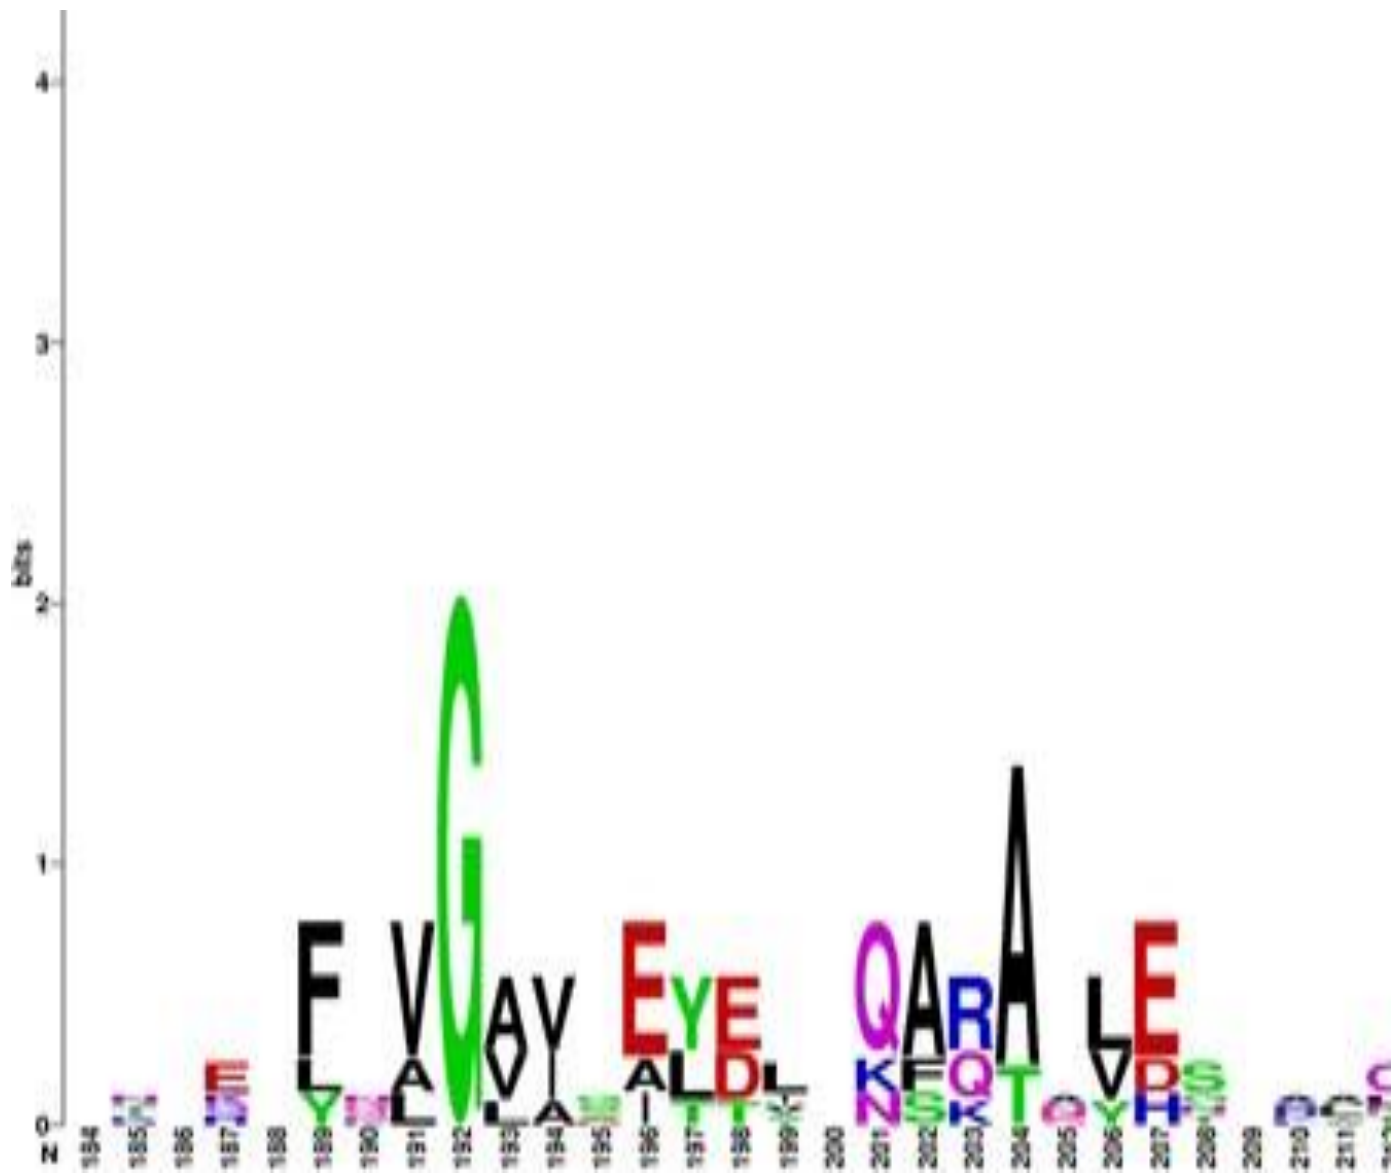

606

607

608

609

610

611

612

613

614

615

616

**Fig 6** Analysis of binding sites in CmeA and CmeC (A) Amino acid alignment of signal peptide processed CmeA orthologues. Conserved amino acids are denoted by an asterisk, similar amino acids are denoted by colon and weak amino acid similarity is denoted by period. The amino acid sequences were retrieved from Uniprot and aligned using Clustal Omega<sup>42</sup>. RLS attachment site is shown to be conserved among periplasmic accessory proteins from different strains. The localisation of N is highlighted in blue box, showing the presence of <sup>123</sup>N at X<sub>1</sub> to the conserved RLS motif in *C. jejuni* and *C. coli* but not *C. fetus* nor *C. lari*. (B) Structural representation focusing on chain A of CmeC trimer (PDB:4MT4). Chain A is highlighted in cyan, <sup>32</sup>N



617 and <sup>49</sup>N are highlighted in red and blue respectively. The proposed attachment site  
618 VGA motif is highlighted in magenta showing its distant from both of the  
619 glycosylation sites. (C) Structural prediction of CmeA. Signal processed amino acid  
620 sequence was deposited in I-TASSER and the best structural fit was based on MexA  
621 model(ref). RLS motif is highlighted in dark red, <sup>123</sup>N and <sup>273</sup>N are highlighted in blue  
622 and light green, respectively showing the close proximity of <sup>123</sup>N to RLS motif in  
623 CmeA. (D) Analysis of outer membrane channel; CmeC, AcrA and OrpM showing  
624 the conservation of Gly structurally located at the tip region of coiled-coil  $\alpha$  hairpin  
625 domain among *Campylobacter* species, *E. coli* and *P. aeruginosa*.

626  
627  
628  
629  
630  
631  
632  
633  
634  
635

636  
637

## Materials and methods

638  
639

### Bacterial strains and growth conditions

640  
641  
642  
643  
644  
645  
646  
647  
648  
649  
650

*Campylobacter jejuni* 11168<sup>10</sup> and its derivatives; *C. jejuni cmeD::cat*, *C. jejuni cmeD::cat wtcmeABC* and *C. jejuni cmeD::cat g0cmeABC* were used in this study. *C. jejuni* 11168H was grown on Columbia based agar or Muller Hinton based agar supplemented with 5% horse blood according to manufacturer's instructions. Strains were grown at 37°C in a variable atmospheric incubator (VAIN) cabinet (Don Whitely, UK) maintaining microaerophilic conditions of: 85% Nitrogen, 5% Oxygen and 10% carbon dioxide. All of the cloning experiments were done in *Escherichia coli* DH10Beta (New England Biolabs, USA). *E. coli* DH10B was used in expression of CmeA and cloning and expression of CmeC whilst gCmeA was expressed in *E. coli* SBD1. *E. coli* strains were grown on either Luria-Bertani Broth or Luria-Bertani Agar and antibiotics were added when necessary.

651  
652  
653  
654  
655  
656

### Inactivation of *cmeD* and generation of *C. jejuni cmeD::cat*, *C. jejuni cmeD::cat wtcmeABC* and *C. jejuni cmeD::cat g0cmeABC*.

657  
658  
659  
660  
661  
662  
663  
664  
665

The nucleotide sequence of *cmeD* gene was commercially synthesized (Clontech, USA) to also carry a chloramphenicol resistant gene; *cat* was inserted in the middle of *cmeD* to disrupt the gene. The DNA was then released by restriction digestion with EcoRV and cloned in pJET1.2 -following manufacturer's instructions- to give pATN. Cloning of *cmeABC-aphA* was achieved by the following; *cmeABC* locus was amplified by primer FWDCmeA and primerREVCmeC with Phusion polymerase (New England biolabs, UK) using *C. jejuni* 11168H genomic DNA as a template, 6Xhis tag was added at the C-terminus of the CmeC to track its expression. The PCR amplicon was cloned in pJET1.2 following the manufacture's instructions to give pMH3 that was then cut by BamHI to introduce the kanamycin resistant gene *aphA*,

666 to be used as an antibiotic selection marker after homologous recombination in *C.*  
667 *jejuni* 11168H to give pMHT. To add homologous recombination arms for *cmeABC-*  
668 *aphA*, pMH3 was cut by SaCII to ligate *cj0364* at the 3' end of *aphA* to give  
669 pMHTF. For g0*cmeABC-aphA*, each  
670 asparagine in the non-canonical glycosylation sequon (D/E-X<sub>1</sub>-N-X<sub>2</sub>- S/T where X<sub>1</sub>  
671 and X<sub>2</sub> are any amino acid except proline) was altered to glutamine *in-silico* and  
672 nucleotide sequence of g0*cmeABC* was synthesized by (Clonotech, USA) DNA was  
673 then treated as above to generate pATKH.

674 To generate *C. jejuni cmeD::cat*, electroporation of pATN into *C. jejuni* 11168H was  
675 carried out as previously described<sup>10</sup>. The transformants were selected on CBA  
676 plates supplemented with 10 µg/ml chloramphenicol and the double cross over  
677 event was confirmed by PCR, this strain was then used as parent strain to generate  
678 other mutants. Plasmids pMHT and pATK were electroporated into *C. jejuni*  
679 *cmeD::cat* to generate *C. jejuni cmeD::cat cmeC::cmeC-aphA* and *C. jejuni cmeD::cat*  
680 *cmeABC::cmeABC-(N->Q)-aphA*, respectively. Transformants were selected on CBA  
681 plates supplemented with 10 µg/ml chloramphenicol and 30 µg/ml kanamycin and  
682 the double cross over event was confirmed by PCR.

### 683 **Antibiotic sensitivity test (E-test)**

684  
685 *C. jejuni* 11168H were grown in suspension in Mueller-Hinton broth  
686 equivalent to 1.0 MacFarland's standard and 100 µl aliquots were spread plated on  
687 dry Mueller-Hinton agar plates supplemented with 5 % Sheep blood (Oxoid, UK),  
688 the plates were left for 5 -10 minutes to dry before the antibiotic strip (Oxoid, UK)  
689 was added. Plates were incubated at 37°C overnight. The minimum inhibitory  
690 concentration (MIC) was read  
691 directly from the strip at the point where the zone of inhibition of bacterial growth  
692 intersected with the antibiotic concentration on the strip.

693 **Ethidium bromide accumulation assay**

694

695 Bacterial cells were grown to mid log phase (OD<sub>600</sub> 0.4-0.5). Cells were harvested,  
696 washed and resuspended in 0.1M sodium phosphate buffer pH 7 (previously  
697 incubated in the VAIN) to OD<sub>600</sub> 0.2. Cells were then incubated in the VAIN for 15  
698 mins at 37°C before a 100µl aliquot was withdrawn to indicate time zero. Ethidium  
699 bromide (Sigma, UK) was added to final concentration 2 µg/ml and fluorescence was  
700 measured at 530 nm excitation and 600 nm emission using a plate reader (Molecular  
701 Devices M3 plate reader, USA).

702 **Expression of CmeA and gCmeA**

703

704 Protein expression was carried out in *E. coli* strains unless stated otherwise. CmeA  
705 and CmeC were expressed in *E. coli* DH10B carrying pMH5 plasmid and pAT3,  
706 respectively, whilst gCmeA was expressed in *E. coli* SDB1 carrying pGVXN114, pWA2  
707 and pACYC(*pgl*). Initiating cultures were grown overnight in LB broth supplemented  
708 with appropriate antibiotics at 37 °C under shaking condition. The following day, 10  
709 ml of culture was withdrawn from the shake flask to inoculate 400 ml LB broth  
710 supplemented with appropriate antibiotics. To achieve optimal glycosylation of  
711 CmeA, PglB was expressed from pGVXN114 by the addition of 0.5 mM IPTG at OD  
712 <sub>600</sub> 0.5-0.6. Cultures were incubated at 37°C for 24 hours with shaking. Cultures  
713 were centrifuged and cell pellets washed with binding buffer (300 mM NaCl, 50 mM  
714 NaH<sub>2</sub>PO<sub>4</sub> with 25mM imidazole) and passed twice through a high pressure cell  
715 homogeniser (Stanstead works, UK). Cell debris was removed by centrifugation at  
716 20,000 xg for 45 minutes. Supernatant was collected and incubated with 0.2 ml Ni-  
717 NTA for 1 hour at 4 °C then washed with 50 ml binding buffer and eluted four times  
718 in 0.5 ml elution buffer (300 mM NaCl, 50 mM NaH<sub>2</sub>PO<sub>4</sub> with 250mM imidazole).

719 **Cloning and expression of CmeC**

720

721 To express CmeC in *E. coli*, *cmeC* lacking signal peptide sequence was amplified by  
722 PCR with CmeCFwd1 and CmeCRev using *C. jejuni* 11168H genomic DNA as a  
723 template. The amplicon was then cut by NheI and Sall and cloned into pEC415  
724 downstream of the DsbA signal peptide sequence to give pCMECDSBA. *E. coli*  
725 carrying pCMECDSBA was grown in LB media supplemented with ampicillin (100  
726 µg/ml) overnight at 37 °C under shaking condition. On the following day, 10 ml were  
727 withdrawn from the overnight culture to inoculate 400 ml LB media. Cells were  
728 grown to OD<sub>600</sub> 0.5-0.6 and 0.2% L-arabinose was added to induce the expression  
729 of CmeC. Cultures were incubated at 37 °C for 24 hours with shaking at 180 rpm.  
730 Cultures were centrifuged and cell pellets washed with binding buffer (300 mM NaCl,  
731 50 mM NaH<sub>2</sub>PO<sub>4</sub> with 25mM imidazole) and passed twice through cell homogeniser  
732 (Stanstead works, UK). Cells debris was removed by centrifugation at 20,000 xg for  
733 45 minutes and then collected and incubated in binding buffer with 2 % DDM for 3  
734 hours at 4 °C. The mixture was then centrifuged at 15,000 xg for 10 minutes. The  
735 supernatant was collected, diluted with binding buffer and incubated with 0.2 ml  
736 Ni-NTA for 1 hour at 4 °C then washed with 50 ml binding buffer and eluted four  
737 times in 0.5 ml elution buffer (300 mM NaCl, 50 mM NaH<sub>2</sub>PO<sub>4</sub> with 250mM  
738 imidazole).

### 739 **CD Spectroscopy**

740  
741 All CD spectra of gCmeA and CmeA were acquired in 0.5mm rectangular cell  
742 pathlength using Chirascan spectrometer (Applied Biophysics, UK) equipped with  
743 Quantum NorthWest TC125 Peltier unit. Temperature dependent confirmation  
744 changes were monitored at wavelength 260-195nm for gCmeA (0.2 mg/ml) and  
745 CmeA (0.2 mg/ml) in 10 mM Sodium phosphate, 75 mM Sodium chloride, 10 %  
746 glycerol buffer (pH=8.0) during stepwise increase in temperature from 6°C to 94°C.  
747 Temperatures were measured directly with a thermocouple probe in the sample

748 solution. Melting temperatures were determined from the derivative CD-  
749 Temperature spectra and fitted using a Levenberg–Marquardt algorithm (LMA) on  
750 the van't Hoff isochore. (Global 3, Global Analysis for T-ramp Version 1.2 built 1786,  
751 Applied Photophysics Ltd, 2007-2012). For Conformation Reversibility Study, far-UV  
752 CD spectra were recorded at 20°C, raised to  $T_m$  and re-cooled to 20°C. The  
753 temperature at each elevated  $T_m$  was kept constant for 5 minutes and the CD  
754 spectrum was recorded to assess the rate of protein unfolding process.

### 755 **Surface Plasmon Resonance**

756  
757 For coupling of CmeA and gCmeA to the CM5 sensor chip, carboxyl groups on the  
758 surface were activated by injecting a 1:1 mixture of 0.4M 1-ethyl-3-(3-  
759 dimethylaminopropyl)-carbodiimide (EDC) and 0.1 M N-hydroxysuccinimide (NHS)  
760 for 7 minutes at 5  $\mu$ l/min. CmeA and gCmeA were diluted to 10-20  $\mu$ g/ml in 0.1 M  
761 acetate pH 5.5 and immobilised at 5  $\mu$ l/min. Immobilisation was stopped when the  
762 required RU was achieved. This was followed by injecting 1M ethanolamine pH 8.5  
763 (7 minutes at 5  $\mu$ l/min) to inactivate excess reactive groups. To account for non-  
764 specific binding, a control flow cell was generated using the same method described  
765 minus the protein immobilisation step. For coupling of CmeA and gCmeA to a NTA  
766 chip, the chip was cleaned and loaded with NiCl<sub>2</sub> (0.5 mM). The flow cells were then  
767 activated as above and CmeA and gCmeA (10  $\mu$ g/ml in HBSP buffer) were loaded into  
768 appropriate flow cells until appropriate RU were achieved. Subsequently the flow  
769 cells were treated with ethanolamine as above to block remaining activated sites.  
770 Cmec at various concentrations (3 nM- 0.2  $\mu$ M) was analysed at a constant temperature of  
771 25°C under continuous flow of HBS-PE buffer (10mM HEPES pH 7.4, 3 mM EDTA, 0.005% (w/v)  
772 Surfactant P20 (GE Healthcare) at 30 $\mu$ l/min (sufficient to prevent mass transfer effects) at  
773 pH  
774 7.4 for 3 minutes association and a dissociation time of 5 minutes. Experiments at pH 6.0  
775 were performed with 10 mM MES pH 6.0, 3 mM EDTA, 0.005% (w/v) Surfactant P20 (GE

776 Healthcare) The surface chip was regenerated by injecting 0.1 M triethanolamine pH 11.5.  
 777 Data was analysed using the BIAevaluation software version 4.1.1 (Biacore, GE Healthcare,  
 778 Amersham). Blank flow cell controls were subtracted. The  $k_d$  was defined between 10s after  
 779 the end of the sample injection and 300 sec later.

780 **Acknowledgements**

781

782 We acknowledge the Wellcome Trust grant 102978/Z/13/Z for funding.

783 **Supplementary figures**

| Strain/Plasmid / Primers                                 | Description                                                                                                                                                                                                                        | Reference               |
|----------------------------------------------------------|------------------------------------------------------------------------------------------------------------------------------------------------------------------------------------------------------------------------------------|-------------------------|
| <i>E. coli</i> DH10B                                     | F <sup>-</sup> <i>mcrA</i> $\Delta$ ( <i>mrr-hsdRMS-mcrBC</i> ) $\Phi$ 80 <i>dlacZ</i> $\Delta$ M15<br><i>lacX74 endA1 recA1 deoR</i> $\Delta$ ( <i>ara,leu</i> )7697<br><i>araD139 galU galK nupG rpsL</i> $\lambda$ <sup>-</sup> | New England Biolabs, UK |
| <i>E. coli</i> SDB1                                      | F- lambda- IN( <i>rrnD-rrnE</i> )1 <i>rph-1, <math>\Delta</math>waal <math>\Delta</math>wecA</i>                                                                                                                                   | 30                      |
| <i>C. jejuni</i> 11168H                                  | Hypermotile variant of <i>C. jejuni</i> 11168                                                                                                                                                                                      | 21                      |
| <i>C. jejuni</i> 11168H<br><i>cmeD::cat</i>              | <i>C. jejuni</i> 11168H <i>cmeD</i> is inactivated by chloramphenicol cassette insertion                                                                                                                                           | This study              |
| <i>C. jejuni</i><br><i>cmeD::cat</i><br>wt <i>cmeABC</i> | <i>C. jejuni</i> 11168H <i>cmeD::cat</i> , <i>cmeC</i> is 6xhis tagged followed by kanamycin cassette to help for selection of CBA plate                                                                                           | This study              |
| <i>C. jejuni</i><br><i>cmeD::cat</i><br>g0 <i>cmeABC</i> | <i>C. jejuni</i> 11168H <i>cmeD::cat</i> , <i>cmeABC</i> is glycosylation deficient by altering N->Q in <i>C. jejuni</i> glycosylation sequon (D/E-X-N-X-S/T where X is any amino acid other than proline)                         | This study              |
| pGVXN114                                                 | PglB cloned in pEXT21 under <i>lac</i> promoter                                                                                                                                                                                    | 41                      |
| pWA2                                                     | Soluble periplasmic 6xHis tagged CmeA under Tet promoter in pBR322                                                                                                                                                                 | 32                      |

|                     |                                                                                                                   |            |
|---------------------|-------------------------------------------------------------------------------------------------------------------|------------|
|                     | promoter in pCAYC184                                                                                              |            |
| pACYC( <i>pgl</i> ) | <i>C. jejuni</i> heptasaccharide coding sequence under Tet promoter in pCAYC184                                   | 32         |
| pJMK30              | <i>aphA</i> gene cloned in BamHI restriction site                                                                 | 42         |
| pCMECSDBA           | Membrane bound 10xHis tagged CmeC driven to periplasm by DsbA signal peptide under L-arabinose promoter in pEC145 | This study |
| pATN                | <i>cmeD::cat</i> cloned in pJET1.2                                                                                | This study |
| pMH3                | <i>cmeABC</i> locus cloned in pJET1.2                                                                             | This study |
| pMHT                | <i>aphA</i> cloned in BamHI site in pMH3                                                                          | This study |
| pMHTF               | <i>cj0364</i> cloned in SacII site in pMHT                                                                        | This study |
| pATM                | <i>g0cmeABC</i> locus cloned in pJET1.2                                                                           | This study |
| pATMN               | <i>aphA</i> cloned in BamHI site in pATM                                                                          | This study |
| pATKH               | <i>cj0364</i> cloned in SacII site in pATMN                                                                       | This study |
| FWDCmeA             | AGCGAAGTTAAAGAAATTGGAGCAC                                                                                         |            |
| REVCmeC             | TTTTCCGCGGATTGGATCCATTATGATGATGATGAT<br>GATGATGTTCTCTAAAGACATATCT                                                 |            |
| FWDCj0364           | TTTTCCGCGGATTCTCTAAATAAATTAATAATCTTTG<br>TCT                                                                      |            |
| REVCj0364           | TTTTCCGCGGCATTGAACCTTTTTGGAGGGATTTTTTC<br>C                                                                       |            |
| FWDCmeC             | TTTTGCTAGCGCCGCCCAAATTTAAATATCCCGAA<br>GCAAACCTATAGCATTG                                                          |            |
| REVCmeC             | TTTTTGTGACcctaTGATGATGATGATGATGATGATGAT<br>GATGATG<br>TTCTCTAAAAGACATATCTAAATTTTTTGATTC                           |            |



## Supplementary figures

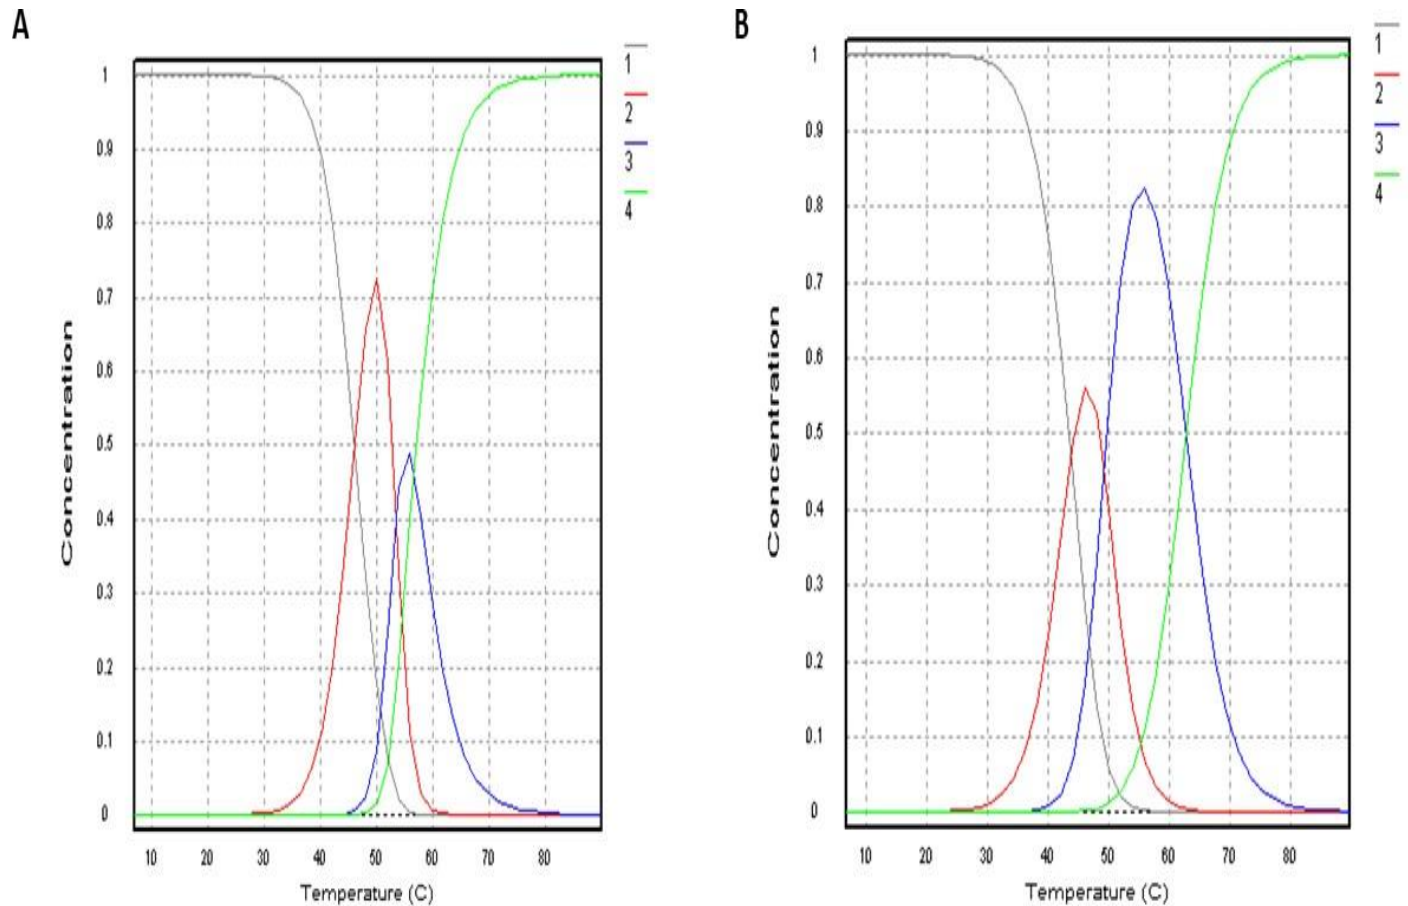

**Supplementary 1. Thermal melts of g0CmeA and g2CmeA in 10 mM sodium phosphate, 75 mM sodium chloride and 10% glycerol (pH 8.0). Concentration as function to temperature representing three transition melting phases for g0CmeA (A); g2CmeA (B).**

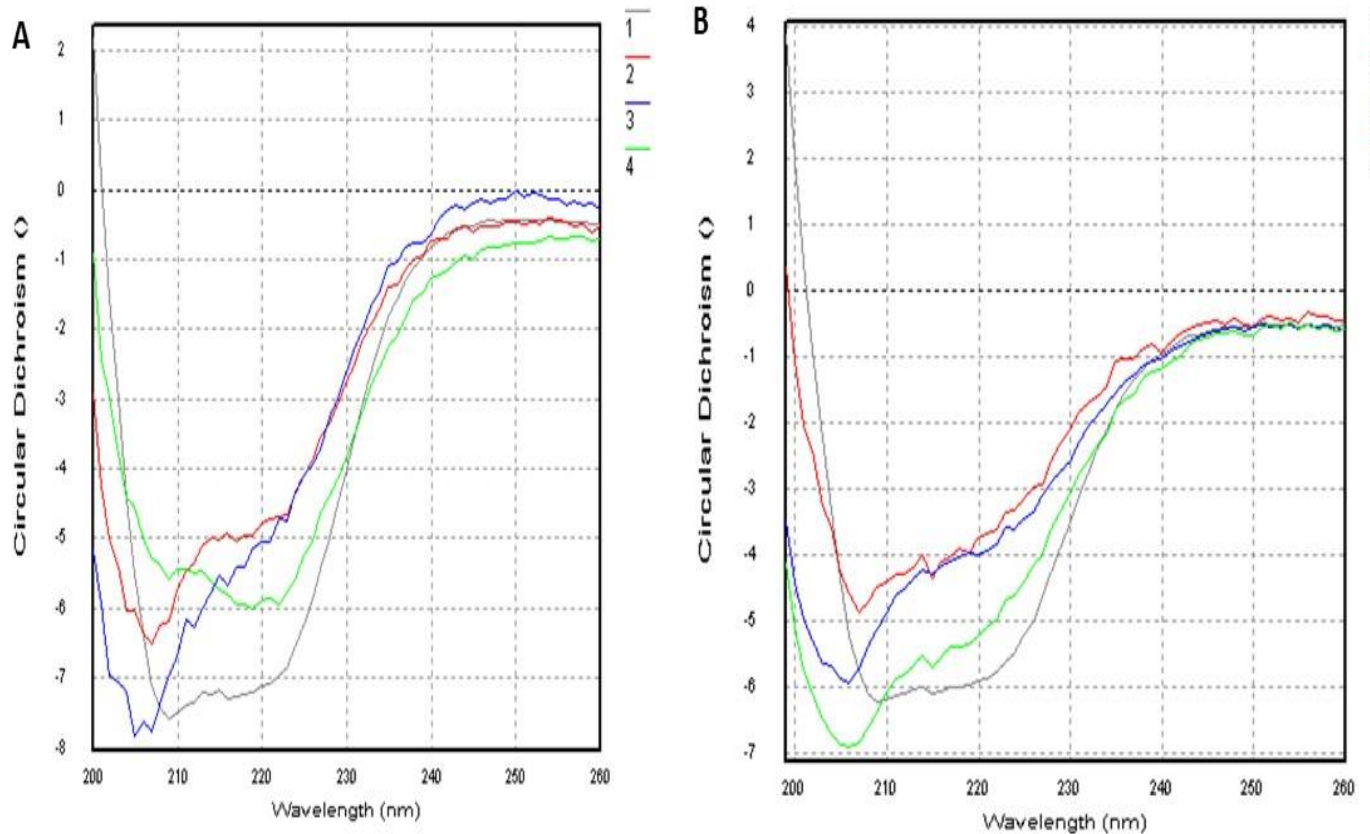

**Supplementary 2. Thermal melts of g0CmeA and g2CmeA in 10 mM sodium phosphate, 75 mM sodium chloride and 10% glycerol (pH 8.0). CD spectra as function to temperature representing more than one melting phases for g0CmeA ,(A); g2CmeA, (B).**

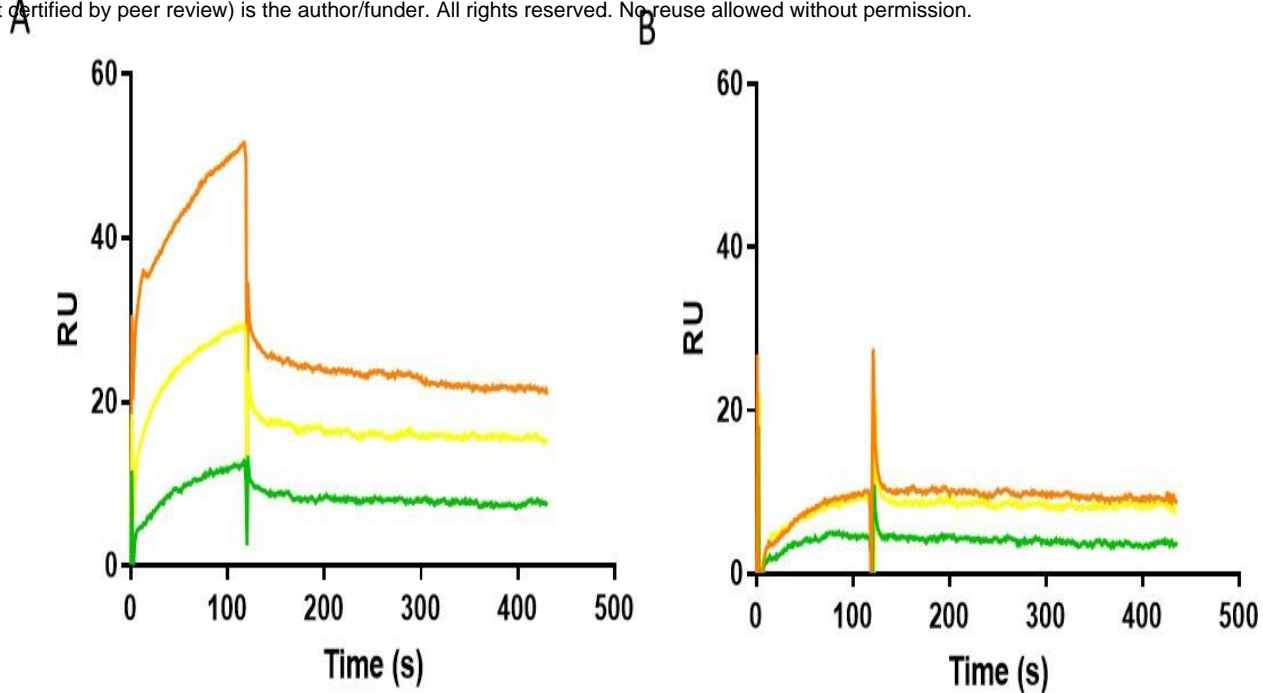

**Supplementary 3** SPR analysis of A) 1090 RU of immobilised g2cmeA and B) 1000RU of immobilisation g0cmeA binding to cmeC offered at 1 x10<sup>-7</sup> M (orange); 5 x10<sup>-8</sup>M (yellow) 2.5x10<sup>-8</sup> M (green) for 2 mins and 5 mins dissociation. CmeA variants were covalently associated by NHS/EDC after association through C-terminal 6Xhis-tag association with the NTA surface.

806  
807

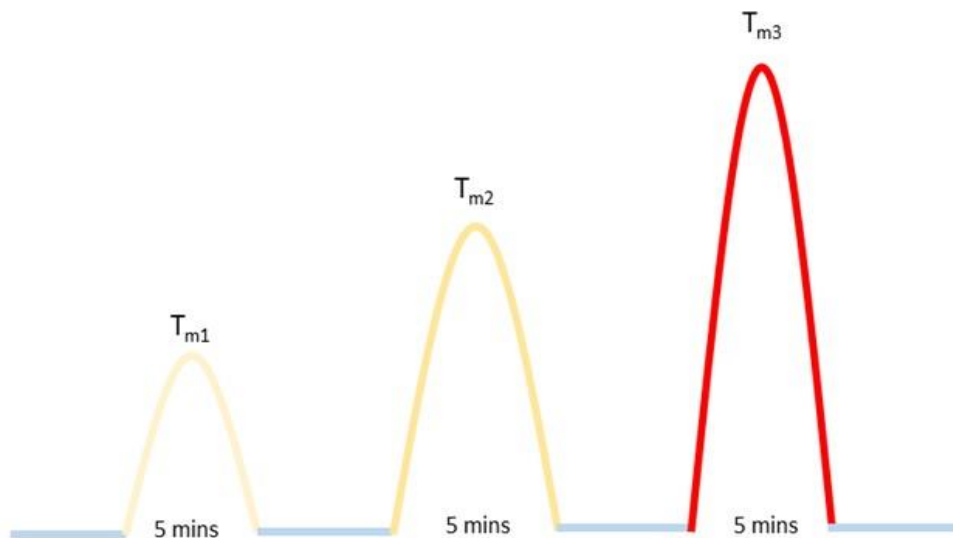

**Supplementary 4** Scheme representing reversibility study CmeA variants were cooled at 20 C (blue) then heated up to T<sub>m</sub> for 5 minutes then cooled again at 20 C the corresponding T<sub>m</sub> are shown from golden yellow to red, CD spectra were recorded at each temperature.

808  
809  
810  
811  
812  
813  
814  
815  
816  
817  
818  
819  
820  
821  
822  
823  
824  
825  
826  
827  
828  
829  
830  
831  
832  
833

## References

1. Schäffer, C. & Messner, P. Emerging facets of prokaryotic glycosylation. *FEMS Microbiology Reviews* (2017). doi:10.1093/femsre/fuw036
2. Hanson, S. R. *et al.* The core trisaccharide of an N-linked glycoprotein intrinsically accelerates folding and enhances stability. *Proc. Natl. Acad. Sci. U. S. A.* (2009). doi:10.1073/pnas.0810318105
3. Biswas, H. & Chattopadhyaya, R. Stability of curcuma longa rhizome lectin: Role of n-linked glycosylation. *Glycobiology* (2016). doi:10.1093/glycob/cwv110
4. Mitra, N., Sinha, S., Ramya, T. N. C. & Surolia, A. N-linked oligosaccharides as outfitters for glycoprotein folding, form and function. *Trends in Biochemical Sciences* (2006). doi:10.1016/j.tibs.2006.01.003
5. Helenius, A. & Aebi, M. Roles of N-Linked Glycans in the Endoplasmic Reticulum. *Annu. Rev. Biochem.* (2004). doi:10.1146/annurev.biochem.73.011303.073752
6. Schwarz, F. & Aebi, M. Mechanisms and principles of N-linked protein glycosylation. *Current Opinion in Structural Biology* (2011). doi:10.1016/j.sbi.2011.08.005
7. Linton, D. *et al.* Functional analysis of the Campylobacter jejuni N-linked protein glycosylation pathway. *Mol. Microbiol.* (2005). doi:10.1111/j.1365-2958.2005.04519.x
8. Jervis, A. J. *et al.* Characterization of the structurally diverse N-linked glycans of Campylobacter species. *J. Bacteriol.* (2012). doi:10.1128/JB.00042-12
9. Nothaft, H. *et al.* Diversity in the protein N-glycosylation pathways within the Campylobacter genus. *Mol. Cell. Proteomics* (2012). doi:10.1074/mcp.M112.021519
10. Karlyshev, A. V. The Campylobacter jejuni general glycosylation system is

- 834 important for attachment to human epithelial cells and in the colonization of chicks.  
835  
836 *Microbiology* **150**, 1957–1964 (2004).  
837
- 838 11. Szymanski, C. M., Burr, D. H. & Guerry, P. Campylobacter protein glycosylation  
839 affects host cell interactions. *Infect. Immun.* (2002). doi:10.1128/IAI.70.4.2242-2244.2002
- 840 12. Larsen, J. C., Szymanski, C. & Guerry, P. N-linked protein glycosylation is required  
841 for full competence in Campylobacter jejuni 81-176. *J. Bacteriol.* (2004).  
842 doi:10.1128/JB.186.19.6508-6514.2004
- 843 13. Lin, J., Sahin, O., Michel, L. O. & Zhang, Q. Critical role of multidrug efflux pump  
844 CmeABC in bile resistance and in vivo colonization of Campylobacter jejuni. *Infect. Immun.*  
845 (2003). doi:10.1128/IAI.71.8.4250-4259.2003
- 846 14. Lin, J., Overbye Michel, L. & Zhang, Q. CmeABC functions as a multidrug efflux  
847 system in Campylobacter jejuni. *Antimicrob. Agents Chemother.* (2002).  
848 doi:10.1128/AAC.46.7.2124-2131.2002
- 849 15. Parkhill, J. *et al.* The genome sequence of the food-borne pathogen Campylobacter  
850 jejuni reveals hypervariable sequences. *Nature* (2000). doi:10.1038/35001088
- 851 16. Akiba, M., Lin, J., Barton, Y. W. & Zhang, Q. Interaction of CmeABC and CmeDEF in  
852 conferring antimicrobial resistance and maintaining cell viability in Campylobacter jejuni. *J.*  
853 *Antimicrob. Chemother.* (2006). doi:10.1093/jac/dki419
- 854 17. Scott, N. E. *et al.* Simultaneous glycan-peptide characterization using hydrophilic  
855 interaction 2 chromatography and parallel fragmentation by CID, HCD and ETD-MS applied to  
856 the N- 3 linked glycoproteome of Campylobacter jejuni. *Am. Soc. Biochem. Mol. Biol.*  
857 (2010). doi:M000031-MCP201
- 858 [pii]\n10.1074/mcp.M000031-MCP201  
859
- 860 18. Su, C. C. *et al.* Crystal structure of the Campylobacter jejuni CmeC outer membrane

- 861 channel. *Protein Sci.* (2014). doi:10.1002/pro.2478
- 862 19. Garcia-Quintanilla, F., Iwashkiw, J. A., Price, N. L., Stratilo, C. & Feldman, M. F.  
863 Production of a recombinant vaccine candidate against *Burkholderia pseudomallei* exploiting  
864 the bacterial N-glycosylation machinery. *Front. Microbiol.* (2014).  
865 doi:10.3389/fmicb.2014.00381
- 866 20. Silverman, J. M. & Imperiali, B. Bacterial N-glycosylation efficiency is dependent on  
867 the structural context of target sequons. *J. Biol. Chem.* (2016). doi:10.1074/jbc.M116.747121
- 868 21. Feldman, M. F. *et al.* Engineering N-linked protein glycosylation with diverse O  
869 antigen lipopolysaccharide structures in *Escherichia coli*. *Proc. Natl. Acad. Sci.* (2005).  
870 doi:10.1073/pnas.0500044102
- 871 22. Jayaprakash, N. G. & Surolia, A. Role of glycosylation in nucleating protein folding  
872 and stability. *Biochem. J.* (2017). doi:10.1042/BCJ20170111
- 873 23. Xin, F. & Radivojac, P. Post-translational modifications induce significant yet not  
874 extreme changes to protein structure. *Bioinformatics* (2012).  
875 doi:10.1093/bioinformatics/bts541
- 876 24. Lee, H. S., Qi, Y. & Im, W. Effects of N-glycosylation on protein conformation and  
877 dynamics: Protein Data Bank analysis and molecular dynamics simulation study. *Sci. Rep.* (2015).  
878 doi:10.1038/srep08926
- 879 25. Micsonai, A., Wien, F., Bulyáki, É., Kun, J., Moussong, É., Lee, Y. H., Goto, Y.,  
880 Réfrégiers, M. & Kardos, J. BeStSel: A web server for accurate protein secondary  
881 structure prediction and fold recognition from the circular dichroism spectra.  
882 *Nucleic Acids Res.* (2018). doi:10.1093/nar/gky497  
883 Tikhonova, E. B., Dastidar, V.,  
884 Rybenkov, V. V. & Zgurskaya, H. I. Kinetic control of TolC recruitment by multidrug  
efflux complexes. *Proc. Natl. Acad. Sci.* (2009). doi:10.1073/pnas.0906601106

- 885  
886  
887  
888  
889  
890  
891  
892  
893  
894  
895  
896  
897  
898  
899  
900  
901  
902  
903  
904  
905  
906  
907  
908  
909  
910  
911
26. Thomas, R. M. *et al.* Glycosylation of DsbA in *Francisella tularensis* subsp. *Tularensis*. *J. Bacteriol.* (2011). doi:10.1128/JB.00438-11
27. Fletcher, C. M., Coyne, M. J., Villa, O. F., Chatzidaki-Livanis, M. & Comstock, L. E. A General O-Glycosylation System Important to the Physiology of a Major Human Intestinal Symbiont. *Cell* (2009). doi:10.1016/j.cell.2009.02.041
28. Fredriksen, L. *et al.* Lactobacillus plantarum WCFS1 O-linked protein glycosylation: An extended spectrum of target proteins and modification sites detected by mass spectrometry. *Glycobiology* (2013). doi:10.1093/glycob/cwt071
29. Horzempa, J., Dean, C. R., Goldberg, J. B. & Castric, P. Pseudomonas aeruginosa 1244 pilin glycosylation: Glycan substrate recognition. *J. Bacteriol.* (2006). doi:10.1128/JB.00273-06
30. Champasa, K., Longwell, S. A., Eldridge, A. M., Stemmler, E. A. & Dube, D. H. Targeted Identification of Glycosylated Proteins in the Gastric Pathogen *Helicobacter pylori* (*Hp*). *Mol. Cell. Proteomics* (2013). doi:10.1074/mcp.M113.029561
31. Lithgow, K. V. *et al.* A general protein O-glycosylation system within the Burkholderia cepacia complex is involved in motility and virulence. *Mol. Microbiol.* (2014). doi:10.1111/mmi.12540
32. Iwashkiw, J. A. *et al.* Identification of a general O-linked protein glycosylation system in Acinetobacter baumannii and its role in virulence and biofilm formation. *PLoS Pathog.* (2012). doi:10.1371/journal.ppat.1002758
33. Vik, A. *et al.* Broad spectrum O-linked protein glycosylation in the human pathogen Neisseria gonorrhoeae. *Proc. Natl. Acad. Sci. U. S. A.* (2009). doi:10.1073/pnas.0809504106
34. Min, T. *et al.* Specificity of campylobacter jejuni adhesin PEB3 for phosphates and

- 912 structural differences among its ligand complexes. *Biochemistry* (2009). doi:10.1021/bi802195d
- 913 35. Jeong, H. *et al.* Pseudoatomic Structure of the Tripartite Multidrug Efflux Pump  
914 AcrAB-TolC Reveals the Intermeshing Cogwheel-like Interaction between AcrA and TolC.  
915 *Structure* (2016). doi:10.1016/j.str.2015.12.007
- 916 36. Davis, L. M., Kakuda, T. & DiRita, V. J. A *Campylobacter jejuni* znuA orthologue is  
917 essential for growth in low-zinc environments and chick colonization. *J. Bacteriol.* (2009).  
918 doi:10.1128/JB.01394-08
- 919 37. Kawai, F. *et al.* Crystal structure of JlpA, a surface-exposed lipoprotein adhesin of  
920 *Campylobacter jejuni*. *J. Struct. Biol.* (2012). doi:10.1016/j.jsb.2012.01.001
- 921 38. Kakuda, T., Koide, Y., Sakamoto, A. & Takai, S. Characterization of two putative  
922 mechanosensitive channel proteins of *Campylobacter jejuni* involved in protection against  
923 osmotic downshock. *Vet. Microbiol.* (2012).  
924 doi:10.1016/j.vetmic.2012.04.044
- 925 39. Eichler, J. & Koomey, M. Sweet New Roles for Protein Glycosylation in Prokaryotes.  
926 *Trends in Microbiology* (2017). doi:10.1016/j.tim.2017.03.001
- 927 40. Ihssen, J. *et al.* Production of glycoprotein vaccines in *Escherichia coli*. *Microb.*  
928 *Cell Fact.* (2010). doi:10.1186/1475-2859-9-61  
929  
930
- 931 41. Van Vliet, A. H. M., Wooldridge, K. G. & Ketley, J. M. Iron-responsive gene  
932 regulation in a *Campylobacter jejuni* fur mutant. *J. Bacteriol.* (1998). Sievers, F. *et al.* Fast,  
933 scalable generation of high-quality protein multiple sequence alignments using Clustal Omega.  
934 *Mol. Syst. Biol.* (2011). doi:10.1038/msb.2011.75
- 935  
936  
937  
938  
939  
940



941  
942  
943  
944
